# Supplementary material for: IMAGINE Network’s Mind And Gut Interactions Cohort (MAGIC) Study: a protocol for a prospective observational multicentre cohort study in inflammatory bowel disease and irritable bowel syndrome
Source: PubMed Central journal article supplement — BMJ Open. 2020 Oct 21;10(10):e041733. doi: 10.1136/bmjopen-2020-041733 (PMC7580069; doi:10.1136/bmjopen-2020-041733), 2020-10-21
Supplement: bmjopen-2020-041733.draft_revisions.pdf [file bmjopen-2020-041733.draft_revisions.pdf]

# BMJ Open

BMJ Open is committed to open peer review. As part of this commitment we make the peer review history of every article we publish publicly available.

When an article is published we post the peer reviewers' comments and the authors' responses online. We also post the versions of the paper that were used during peer review. These are the versions that the peer review comments apply to.

The versions of the paper that follow are the versions that were submitted during the peer review process. They are not the versions of record or the final published versions. They should not be cited or distributed as the published version of this manuscript.

BMJ Open is an open access journal and the full, final, typeset and author-corrected version of record of the manuscript is available on our site with no access controls, subscription charges or pay-per-view fees (<http://bmjopen.bmj.com>).

If you have any questions on BMJ Open's open peer review process please email [info.bmjopen@bmj.com](mailto:info.bmjopen@bmj.com)

# BMJ Open

**IMAGINE Network's Mind And Gut Interactions Cohort  
(MAGIC) Study:  
A protocol for a prospective observational multi-centre  
cohort study in Inflammatory Bowel Disease & Irritable  
Bowel Syndrome**

|                               |                                                                                                                                                                                                                                                                                                                                                                                                                                                                                                                                                                                                                                                                                                                                                                                                                                                                                                                                                                       |
|-------------------------------|-----------------------------------------------------------------------------------------------------------------------------------------------------------------------------------------------------------------------------------------------------------------------------------------------------------------------------------------------------------------------------------------------------------------------------------------------------------------------------------------------------------------------------------------------------------------------------------------------------------------------------------------------------------------------------------------------------------------------------------------------------------------------------------------------------------------------------------------------------------------------------------------------------------------------------------------------------------------------|
| Journal:                      | <i>BMJ Open</i>                                                                                                                                                                                                                                                                                                                                                                                                                                                                                                                                                                                                                                                                                                                                                                                                                                                                                                                                                       |
| Manuscript ID                 | bmjopen-2020-041733                                                                                                                                                                                                                                                                                                                                                                                                                                                                                                                                                                                                                                                                                                                                                                                                                                                                                                                                                   |
| Article Type:                 | Protocol                                                                                                                                                                                                                                                                                                                                                                                                                                                                                                                                                                                                                                                                                                                                                                                                                                                                                                                                                              |
| Date Submitted by the Author: | 18-Jun-2020                                                                                                                                                                                                                                                                                                                                                                                                                                                                                                                                                                                                                                                                                                                                                                                                                                                                                                                                                           |
| Complete List of Authors:     | Moayyedi, Paul; McMaster University Faculty of Health Sciences, Medicine<br>MacQueen, Glenda; University of Calgary<br>Bernstein, Charles; University of Manitoba, Gastroenterology<br>Vanner, Stephen; Queen's University<br>Bercik, Premysl; McMaster University, Medicine<br>Surette, Michael; McMaster University,<br>Madsen, Karen; University of Alberta<br>Rioux, John; Universite de Montreal<br>Dieleman, Levinus; University of Alberta, Edmonton, Alberta<br>Verdú, Elena; McMaster University, Division of Gastroenterology<br>de Souza, Russell; McMaster University, Department of Clinical<br>Epidemiology & Biostatistics<br>Otley, Anthony; Dalhousie University<br>Targownik, Laura; Mount Sinai Hospital<br>Lavis, John; McMaster University<br>Marshall, Deborah; University of Calgary, Department of Community<br>Health Sciences<br>Zelinsky, Sandra; University of Calgary, PaCER Innovates<br>Fernandes, Aida; McMaster University, Medicine |
| Keywords:                     | Inflammatory bowel disease < GASTROENTEROLOGY, Functional bowel disorders < GASTROENTEROLOGY, Depression & mood disorders < PSYCHIATRY, Microbiology < NATURAL SCIENCE DISCIPLINES, Nutritional support < GASTROENTEROLOGY                                                                                                                                                                                                                                                                                                                                                                                                                                                                                                                                                                                                                                                                                                                                            |
|                               |                                                                                                                                                                                                                                                                                                                                                                                                                                                                                                                                                                                                                                                                                                                                                                                                                                                                                                                                                                       |

SCHOLARONE™  
Manuscripts

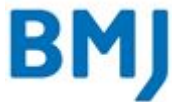

I, the Submitting Author has the right to grant and does grant on behalf of all authors of the Work (as defined in the below author licence), an exclusive licence and/or a non-exclusive licence for contributions from authors who are: i) UK Crown employees; ii) where BMJ has agreed a CC-BY licence shall apply, and/or iii) in accordance with the terms applicable for US Federal Government officers or employees acting as part of their official duties; on a worldwide, perpetual, irrevocable, royalty-free basis to BMJ Publishing Group Ltd ("BMJ") its licensees and where the relevant Journal is co-owned by BMJ to the co-owners of the Journal, to publish the Work in this journal and any other BMJ products and to exploit all rights, as set out in our [licence](#).

The Submitting Author accepts and understands that any supply made under these terms is made by BMJ to the Submitting Author unless you are acting as an employee on behalf of your employer or a postgraduate student of an affiliated institution which is paying any applicable article publishing charge ("APC") for Open Access articles. Where the Submitting Author wishes to make the Work available on an Open Access basis (and intends to pay the relevant APC), the terms of reuse of such Open Access shall be governed by a Creative Commons licence – details of these licences and which [Creative Commons](#) licence will apply to this Work are set out in our licence referred to above.

Other than as permitted in any relevant BMJ Author's Self Archiving Policies, I confirm this Work has not been accepted for publication elsewhere, is not being considered for publication elsewhere and does not duplicate material already published. I confirm all authors consent to publication of this Work and authorise the granting of this licence.

## IMAGINE Network's Mind And Gut Interactions Cohort (MAGIC) Study:

A protocol for a prospective observational multicentre cohort study in  
Inflammatory Bowel Disease & Irritable Bowel Syndrome

### Authors:

Paul Moayyedi<sup>1</sup>, Glenda MacQueen (post-humous)<sup>2</sup>, Charles N Bernstein<sup>3</sup>, Stephen Vanner<sup>4</sup>,  
Premysl Bercik<sup>1</sup>, Karen L Madsen<sup>5</sup>, Michael G Surette<sup>1</sup>, John D Rioux<sup>6,7</sup>, Levinus A. Dieleman<sup>5</sup>,  
Elena F Verdu<sup>1</sup>, Russel De Souza<sup>1</sup>, Antony Otley<sup>8</sup>, Laura Targownik<sup>9</sup>, John Lavis<sup>10</sup> Deborah  
Marshall<sup>2</sup>, Sandra Zelinsky<sup>2</sup>, Aida Fernandes<sup>1,2</sup>, on behalf of the IMAGINE Network

1. Farncombe Family Digestive Health Institute, McMaster University, Hamilton, ON, Canada
2. University of Calgary, AB, Canada
3. University of Manitoba, Winnipeg, MB, Canada
4. Queen's University, Kingston, ON, Canada
5. University of Alberta, Edmonton, AB, Canada (bercikp@mcmaster.ca)
6. Université de Montréal, Montréal, QC, Canada
7. Montreal Heart Institute, Montreal, QC, Canada
8. Dalhousie University, Halifax, NS, Canada
9. University of Toronto, ON, Canada
10. McMaster Health Forum, McMaster University, Hamilton, ON, Canada

### Key Words:

Inflammatory bowel disease (IBD), irritable bowel syndrome (IBS), Crohn's disease, ulcerative colitis,  
prospective observational cohort, microbiome, diet, genetic, microbiome, metabolome

ClinicalTrials.gov Identifier: NCT03131414

**ABSTRACT (reduce to 250 words)**

**Introduction:** Gut microbiome and diet may be important in irritable bowel syndrome (IBS), inflammatory bowel disease (IBD), and comorbid psychiatric conditions but the mechanisms are unclear. We will create a large cohort of patients with IBS, IBD and healthy controls and follow them over time, collecting dietary and mental health information and biological samples, to assess their gastrointestinal (GI) and psychological symptoms in association with their diet, gut microbiome and metabolome.

**Methods and Analysis:** This five-year observational prospective cohort study is recruiting 8000 participants from 15 Canadian centers. Persons with IBS who are 13 years of age and older or IBD  $\geq$  5 years will be recruited. Healthy controls will be recruited from the general public and from friends or relatives of those with IBD or IBS who do not have GI symptoms. Participants answer surveys and provide blood, urine, and stool samples annually. Surveys assess disease activity, quality of life, physical pain, lifestyle factors, psychological status, and diet. The main outcomes evaluated will be the association between the diet, inflammatory, genetic, microbiome and metabolomic profiles in those with IBD and IBS compared with healthy controls using multivariate logistic regression. We will also compare these profiles in those with active versus quiescent disease and those with and without psychological comorbidity.

**Ethics and Dissemination:** Approval has been obtained from the institutional review boards of all centres taking part in the study. We will develop evidence-based knowledge translation initiatives for patients, clinicians and policy-makers to disseminate results to relevant stakeholders.

## Strengths and Limitations

- This is the largest observational study evaluating the microbiome in inflammatory bowel disease and irritable bowel syndrome.
- The patients' disease type and activity are well characterized with detailed information on diet and mental health.
- The degree of patient engagement is another strength of the study.
- The microbiome and diet assessment are conducted once per year and may not correlate with disease flare-ups.
- As with all observational studies, any association may not be causal and will need evaluation in randomized controlled trials.

## INTRODUCTION

Two thirds of the population experience significant gastrointestinal (GI) symptoms at some point in their life (1). One of the most common GI disorders is irritable bowel syndrome (IBS), affecting up to 10% of persons worldwide, depending on the definition (2). Another GI disorder that is associated with significant health care resources is inflammatory bowel disease (IBD) which affects approximately 0.3% of the world's industrialized population (3).

The cardinal features of IBS include chronic abdominal pain over 3 months per year related to a change in bowel habit and the disease can present at any age (2,4). IBD is a term encompassing two distinct but related diseases: ulcerative colitis (UC) and Crohn's disease (CD). The cardinal symptom of UC is bloody diarrhea whilst in CD abdominal pain is a more prominent symptom, but

1  
2  
3 diarrhea is a feature as well (5). IBD has the highest incidence in second and third decades of life  
4  
5 and are lifelong relapsing and remitting diseases. Growth impairment can be an issue in children  
6  
7 with CD.  
8  
9

10  
11 Both IBS and IBD significantly impact quality of life (6, 7) and often surgery is needed in patients  
12  
13 with IBD (8). IBS and IBD also account for significant health care spending in the developed world  
14  
15 with many countries spending billions of dollars per annum (9). Persons with IBS and IBD have  
16  
17 higher rates of anxiety and depression compared to the general population (10, 11) and those with  
18  
19 other chronic diseases (12). The corollary is also true; persons with anxiety and depression have  
20  
21 more GI symptoms compared to healthy controls (13). Therapy for IBS has traditionally focused on  
22  
23 drugs that alter motility or visceral sensitivity of the GI tract and although various interventions are  
24  
25 superior to placebo, the overall impact on symptoms is only modest (14). Therapy for IBD has  
26  
27 traditionally focused on drugs that inhibit the exaggerated pro-inflammatory immune response,  
28  
29 however only 50% of the patients achieve clinical remission, whereas clinical relapses are common.  
30  
31  
32  
33  
34  
35  
36  
37

38 There is evidence that the gut microbiome and diet are important in IBS (15), IBD (16), and  
39  
40 comorbid psychiatric conditions (17). There is however a need for more longitudinal prospective  
41  
42 data on this interaction in patients with IBD and IBS compared with healthy controls. We have  
43  
44 conducted systematic reviews in both IBS (18) and IBD (19); although there are numerous case  
45  
46 control studies exploring the gut microbiome in these conditions, the median sample size is around  
47  
48 20 per arm and in all cases the sample size was insufficient to deal with the multiple testing issues  
49  
50 that relate to microbiome research in humans. In addition, inter-individual differences of the gut  
51  
52 microbiome are large. Large sample sizes and longitudinal sampling within the same individuals  
53  
54  
55  
56  
57  
58  
59  
60

1  
2  
3 over time are therefore needed to evaluate the interaction between diet, the microbiome, IBS, IBD  
4  
5 and associated mental health issues.  
6  
7  
8  
9

10 The Inflammation, Microbiome, and Alimentation: Gastro-Intestinal and Neuropsychiatric Effects  
11 (IMAGINE) (20) (see appendix for members) Strategy for Patient Oriented Research (SPOR)  
12 Network is conducting a five-year multicenter prospective observational cohort study, Mind And  
13 Gut Interactions Cohort (MAGIC). It will explore the interaction between the diet, microbiome and  
14  
15 the host associated with IBS and IBD in order to better target treatment of IBD and IBS and the  
16  
17 psychiatric disorders associated and affecting these diseases. The overarching hypothesis of this  
18  
19 study is that IBS and IBD are driven by a perturbation of the gut microbiome and the associated host  
20  
21 immune response. Alterations in the gut microbiome may also drive anxiety and depression  
22  
23 associated with these GI disorders and these psychological factors may in turn influence gut  
24  
25 symptoms and its microbiome. These mechanisms may also have a genetic predisposition.  
26  
27  
28  
29  
30  
31  
32  
33  
34

### 35 **Aims**

36  
37 The main aim of the MAGIC study conducted through the IMAGINE SPOR Network is to create a  
38  
39 large cohort of patients with IBS, IBD and healthy controls and follow these individuals over time,  
40  
41 assessing disease activity, diet, mental health and demographic information using validated  
42  
43 questionnaires and collecting annual stool, urine and blood samples, to correlate GI and  
44  
45 psychological symptoms with an individual's genetic variants, diet, and gut microbiome, as well  
46  
47 host and microbiome metabolic products in stool, urine and serum.  
48  
49  
50  
51  
52  
53

### 54 ***Primary aims for baseline data***



- 1
- 2
- 3 1. We will compare the gut microbiome and metabolomic profile between CD, UC, IBS and healthy
- 4 controls. The main analyses will be between a specific disorder and healthy controls.
- 5
- 6
- 7
- 8 2. We will compare the gut microbiome and metabolomics profile of participants with active versus
- 9 quiescent disease within CD, UC and IBS.
- 10
- 11
- 12 3. We will compare the gut microbiome and metabolomic profile of participants with and without
- 13 psychiatric co-morbidity for each of CD, UC, IBS and healthy controls.
- 14
- 15
- 16
- 17
- 18

### ***Primary aims for longitudinal data***

- 19
- 20
- 21 1. Microbiome, metabolomic, genetic, inflammatory markers, dietary, disease phenotype, psychiatric
- 22 comorbidity and demographic predictors of failure of therapy for each of UC, CD, and IBS.
- 23
- 24 2. Comparison of microbiome, metabolomic, genetic, dietary and demographic factors in IBD of
- 25 participants who remain in clinical remission over 2 years versus those with recurrent active disease
- 26 (UC and CD analyzed separately).
- 27
- 28 3. Comparison of gut microbiome, metabolomic, genetic, dietary and demographic factors in
- 29 participants with IBS with mild/inactive disease (based on IBS-Symptom Severity Score (SSS))
- 30 compared with those with ongoing active disease. IBS will be evaluated overall and also within
- 31 subgroups independently.
- 32
- 33
- 34
- 35
- 36
- 37
- 38
- 39
- 40
- 41
- 42
- 43

### ***Secondary aims for baseline data***

- 44
- 45
- 46 1. To compare dietary patterns between patients with CD, UC, IBS and healthy controls.
- 47
- 48 2. To compare genetic risk factors between CD, UC, IBS and healthy controls.
- 49
- 50
- 51 3. To compare gut microbiome, metabolomic, genetic, dietary and demographic factors in
- 52 participants with IBD with quiescent inflammatory disease with and without concomitant IBS
- 53
- 54
- 55
- 56
- 57
- 58
- 59
- 60

1  
2  
3 (defined by fecal calprotectin <50 and subthreshold IBD symptom activity score but who have  
4 active IBS symptoms on IBS-SSS).  
5  
6

7  
8 4. To compare the prevalence of mood and anxiety disorders in participants with each disorder  
9 against rates in healthy controls.  
10

11  
12 5. To compare the dietary, gut microbiome and metabolomics profile between participants with or  
13 without anxiety (CD, UC, IBS, healthy controls analyzed separately).  
14

15  
16 6. To compare the dietary, gut microbiome and metabolomics profiles between participants with and  
17 without depression (CD, UC, IBS, healthy controls analyzed separately).  
18

19  
20 7. To determine whether high rates of early adverse experiences are associated with history of more  
21 severe disease or treatment resistance in participants with CD, UC or IBS.  
22

23  
24 8. To examine the association between symptom severity and multiple domains of function in  
25 participants with CD, UC or IBS.  
26

27  
28 9. To develop models describing how factors such as microbiome, metabolome, diet, genes and  
29 psychiatric symptoms interact in CD, UC, and IBS.  
30  
31  
32  
33  
34  
35  
36  
37

### 38 ***Secondary aims for longitudinal data***

39  
40 1. To compare health care resource use between CD, UC, IBS and healthy controls.  
41

42 2. To compare work productivity between CD, UC, IBS and healthy controls.  
43

44 3. To compare baseline dietary and gut microbiome and urinary metabolome profiles and  
45 inflammatory markers in participants that develop anxiety during follow up versus those who did not  
46 have anxiety at any time (CD, UC, IBS and healthy controls analyzed separately).  
47  
48

49 4. To compare baseline dietary and gut microbiome and urinary metabolome profiles in participants  
50 that develop depression during follow up versus those that did not have depression at any time (CD,  
51  
52  
53  
54  
55  
56  
57  
58  
59  
60

1  
2  
3 UC, IBS and healthy controls analyzed separately and if appropriate combined).

4  
5 7. To compare gut microbiome, urinary metabolome, genetic, dietary and demographic factors in  
6  
7 IBS at baseline in those that change their IBS subtype during follow up and those that continue with  
8  
9 the same IBS subgroup.

10  
11 8. To compare which dietary, mental health, gut microbiome and metabolomics profiles precede a  
12  
13 clinical relapse in patients with IBD and how these parameters are different in patients with active  
14  
15 disease versus those who remain in clinical remission.  
16  
17  
18  
19  
20

## 21 **METHODS**

### 22 **Design**

23  
24  
25 The IMAGINE MAGIC study is a prospective observational cohort study that is recruiting 2000  
26  
27 participants with each of CD, UC, and IBS and also 2000 healthy participants in 15 centers across  
28  
29 Canada. Assessment includes psychological status, dietary intake, gut microbiome, urinary  
30  
31 metabolomic profile, inflammatory markers, genotype, health-related quality of life, and health care  
32  
33 resource use and associated costs. The cohort and healthy controls will be followed annually for up  
34  
35 to 4 years after the baseline study enrollment.  
36  
37  
38  
39  
40  
41

42 At each visit, the participant provides blood, urine, and stool samples as well as complete  
43  
44 questionnaires assessing disease activity, quality of life, physical pain, lifestyle factors,  
45  
46 psychological status, and diet. Table 1 summarizes participant information collected at each visit.  
47  
48  
49  
50

### 51 **Participants**

52  
53  
54  
55  
56  
57  
58  
59  
60

1  
2  
3 A total of 8000 participants will be recruited, 2000 for each for healthy volunteers, IBS, UC and CD.  
4  
5 Inclusion and exclusion criteria are outlined in Table 1.  
6  
7  
8  
9

10 Healthy participants over the age of 4 will be recruited from the relatives, spouses and friends of IBS  
11 and IBD cases taking part and also through advertisement for healthy volunteers.  
12  
13  
14  
15

16  
17 IBS: Persons who meet Rome IV criteria and are 13 years of age or older are enrolled (Table 1).  
18

19 Persons with IBS are categorized into diarrhea-predominant IBS (IBS-D), constipation-predominant  
20 IBS (IBS-C), IBS with mixed bowel habits (IBS-M), or unclassified with IBS (IBS-U) (21). Patients  
21 with IBS that also have celiac disease will be eligible provided they continue to have symptoms after  
22 six months of a gluten free diet and their tissue transglutaminase antibody has returned to normal.  
23  
24  
25  
26  
27  
28  
29

30 IBD: Persons with either CD or UC over the age of 4 years are enrolled regardless of whether the  
31 disease is active or in remission (Table 1). Persons with unclassified IBD (IBD-U) are included. The  
32 Montreal Classification is used for adult CD and UC patients (22), and the Paris classification (23)  
33 for pediatric IBD. The research coordinator conducts a chart review to confirm the date of diagnosis  
34 and maximal phenotype at time of enrolment using the Montreal Classification.  
35  
36  
37  
38  
39  
40  
41  
42  
43

#### 44 **Data Collection**

45  
46 All participants attend a baseline, 12, 24, 36 and 48-month visit. Sources of information for each  
47 patient are blood, urine and stool samples, questionnaires, and chart review (Table 2).  
48  
49  
50  
51  
52  
53  
54  
55  
56  
57  
58  
59  
60

1  
2  
3 Participants complete a questionnaire to obtain age, sex, gender identity, education level attained,  
4 ethnic heritage, smoking/alcohol/drug history, comorbidities, medication and therapies, menstrual  
5 status at baseline. The study research coordinator records height, weight, BMI and disease-related  
6 information (24). Participants answer a series of questionnaires to assess disease activity, quality of  
7 life, physical pain, lifestyle factors, psychological status, and diet at each study visit. (Table 3).  
8  
9  
10  
11  
12  
13  
14 Healthcare resource use data and associated costs regarding physician visits, clinical procedures,  
15 imaging procedures, hospitalizations, emergency room visits, and medication use are collected by  
16 linking the participants to provincial administrative data from the Canadian Gastro-Intestinal  
17 Epidemiology Consortium (CanGIEC) (<https://cangiec.ca>).  
18  
19  
20  
21  
22  
23  
24  
25

### 26 **Biosamples**

27  
28 A stool sample is collected for fecal microbiome and inflammatory markers, a urine sample is  
29 collected for metabolomics, and blood samples are taken for DNA isolation as well as for serum for  
30 inflammatory markers and metabolomics at each study visit. All biosamples are shipped to  
31  
32  
33  
34  
35  
36  
37  
38  
39  
40  
41  
42  
43  
44  
45  
46  
47  
48  
49  
50  
51  
52  
53  
54  
55  
56  
57  
58  
59  
60  
Population Health Research Institute (PHRI) for storing at -80 degrees Celsius.

### 40 **Data Management**

41  
42  
43  
44  
45  
46  
47  
48  
49  
50  
51  
52  
53  
54  
55  
56  
57  
58  
59  
60  
Questionnaires are completed electronically using tablets during the clinic with the option to  
complete the any questionnaires remaining after clinic visit at home on a computer using an e-mail  
link. The user questionnaires are available in the REDCap platform stored at a central database  
collection center, PHRI, at McMaster University. Study staff will review surveys within two weeks  
of receipt and highlight any missing answers that suggests a problem in completing the survey.  
These issues will be discussed with the PI, site lead and study team. The staff contact participants up

1  
2  
3 to three times by phone e-mail or in person at a regular study visit to remind them to complete  
4  
5 questionnaires and to acquire answers to missing items.  
6  
7  
8  
9

## 10 **Patient and Public Involvement**

11  
12 The research proposed in IMAGINE was informed by patients. Patient perspectives were sought in  
13  
14 identifying priorities for strategic research funding opportunities. Diet, researching the gut  
15  
16 microbiome, and mental health were initially identified as key priorities through this process. Through  
17  
18 the Crohn's and Colitis Canada (CCC) "Gutsy Learning Series" these priorities were further defined  
19  
20 with 289 lay participants in-person and on-line with IBD who gave feedback on what they felt were  
21  
22 the most important research topics, identifying fecal transplants, diet and mental health as key  
23  
24 priorities. Furthermore, through a workshop organized by the Canadian Digestive Health Foundation  
25  
26 (CDHF) prior to this IMAGINE SPOR application, a key message was that IBS patients are concerned  
27  
28 about using current pharmacological therapies to relieve their symptoms and prefer approaches that  
29  
30 correct the imbalances they perceive to be the root cause of their disorder rather than taking drugs.  
31  
32 Patients with IBS are concerned with the long-term use of powerful and sometimes expensive agents  
33  
34 and would like more exploration of the factors that are driving the disease. One of the major areas this  
35  
36 patient group wanted more research on was the role of diet and also the role that gut bacteria (and  
37  
38 probiotics) play in driving IBS. There is remarkable congruence in the research priorities of the IBD  
39  
40 and IBS patient communities. The IMAGINE SPOR proposal was informed by these priorities and  
41  
42 seeks to address them by exploring the diet-gut microbiome-relationship and how this influences GI  
43  
44 and mental symptoms of IBS and IBD.  
45  
46  
47  
48  
49  
50  
51  
52  
53  
54  
55  
56  
57  
58  
59  
60

1  
2  
3 IMAGINE Patient Research Partners were involved in the development of the MAGIC demographic  
4 questionnaire. They also served to pilot test the online questionnaires and provide feedback on user  
5 experience and feasibility.  
6  
7  
8  
9

10  
11  
12 IMAGINE Patient Partners have been directly involved with study design and recruitment of subjects  
13 in IMAGINE and will support capacity development for patient engagement more broadly. In person  
14 interviews are being conducted by our Patient Partners to identify strategies to improve recruitment  
15 and retention rates. Also, this network of patient-engaged researchers is communicating knowledge  
16 derived from the study to healthcare professionals, policy makers, and other patients.  
17  
18  
19  
20  
21  
22  
23

24  
25  
26 A key component of the IMAGINE research program is developing capacity for patient engagement,  
27 patient preferences for informing treatment choices and working with our Patient Partners to improve  
28 our recruitment rates and long-term retention of IMAGINE participants. We have a unique opportunity  
29 to integrate patient engagement as recommended by SPOR by leveraging our innovative Patient and  
30 Community Engagement Research (PaCER) program based at the University of Calgary (25, 26).  
31  
32 PaCER is designed to promote new roles for patients and family members in health care and health  
33 culture through engagement in research. PaCER provides opportunities for patients to be involved in  
34 the development and conduct of research designed to affect the lives of patients living with IBD and  
35 IBS. Involving patients and families in research is an opportunity to increase the capacity to anticipate  
36 problems, manage their condition as a partner in their health care team, and to support other patients  
37 and families.  
38  
39  
40  
41  
42  
43  
44  
45  
46  
47  
48  
49  
50  
51  
52  
53

## 54 **DATA MONITORING AND ETHICS**

55  
56  
57  
58  
59  
60

1  
2  
3 This is an observational study with no intervention mandated by the protocol and so there is no  
4 external data safety and monitoring board. Research ethics approval has been obtained for all 15  
5 sites involved in the study. The protocol was approved on May 31, 2017 with an approval number  
6 2017-3000-GRA with the last amendment to date being on June 25, 2019. The study was first  
7 registered on April 27<sup>th</sup> 2017 (ClinicalTrials.gov Identifier: NCT03131414) and this was last  
8 updated on March 7<sup>th</sup> 2019.  
9  
10  
11  
12  
13  
14  
15  
16  
17  
18

## 19 **SAMPLE SIZE AND ANALYSES**

### 20 **Sample size**

21  
22 UC, CD and IBS cases will be analyzed. A sample size of 2000 cases in each disease group and  
23 2000 healthy controls will have 90% power to detect a probability of 0.547 that an observed  
24 abundance in the disease group is more than the observed abundance in the control group using a  
25 Wilcoxon (Mann-Whitney) rank-sum test with a 0.001 two-sided significance level (to adjust for  
26 multiple testing). This sample size also assumes 20% data dropout. The probability of 0.547 was  
27 derived from 75 IBD cases that we have obtained from pilot studies (27).  
28  
29  
30  
31  
32  
33  
34  
35  
36  
37  
38  
39

### 40 **Analyses**

41  
42 Primary and secondary aims will be evaluated through multivariate logistic regression with further  
43 details regarding how diet, microbiome, metabolomics and genetics will be analysed below.  
44  
45  
46  
47  
48

### 49 ***Diet Analyses***

50  
51 We will use principal component analysis to derive dietary patterns from self-reported semi-  
52 quantitative food-frequency questionnaires, and understand the differences in dietary patterns across  
53  
54  
55  
56  
57  
58  
59  
60



1  
2  
3 participants with UC, CD, IBS, and healthy controls; and for active versus non-active disease within  
4 each disease group, as outlined in the primary and secondary aims. Briefly, the purpose of PCA  
5 and/or machine learning is to reduce large and complex high-dimensional data into fewer  
6 dimensions — in this case comprehensive FFQ data (containing up to 150 items or more) is reduced  
7 to 2 or 3 dietary patterns (i.e., foods commonly consumed together) that explain the greatest amount  
8 of dietary variability within the reported eating habits of the cohort (28). The number of dietary  
9 patterns to be retained for subsequent analysis will be based on visual inspection of Scree plots in  
10 conjunction with eigenvalues, and principal component interpretability (29). To account for  
11 differences in total energy intake between participants, dietary pattern scores will be adjusted to the  
12 mean total population caloric intake using the residual method (28). Associations between a  
13 participant's adherence to a specific PCA-derived dietary pattern (e.g., Western or plant-based) and  
14 UC, CD, IBS and its disease activity will be quantified using logistic regression (case vs control)  
15 with appropriate adjustment for covariates (e.g., BMI, age, sex, etc.). For machine learning, dietary  
16 patterns will be derived using unsupervised methods that require little to no input or direction by the  
17 researcher. The use of both PCA and unsupervised machine learning methods will allow for  
18 validation of the derived diet patterns. Our experience suggests that the PCA and machine learning  
19 derived patterns will be largely similar (30).

20  
21  
22 In an exploratory analysis, of particular interest for the IBS group, we will collect data using a  
23 supplementary fermentable oligo-di-monosaccharides and polyols (FODMAP) Questionnaire to  
24 capture foods rich in: a) oligosaccharides, including fructans and galacto-oligosaccharides; b)  
25 disaccharides, including lactose; c) monosaccharides, including fructose; d) polyols. These data will  
26 be used to better understand “trigger foods” or dietary components that are likely to produce

1  
2  
3 symptoms in participants with IBS.  
4  
5  
6  
7

### 8 ***Microbiome Processing and Analyses***

9  
10 All stool samples will be processed in one lab for consistency. Frozen samples sent from each site  
11 will be thawed on ice in an anaerobic environment, mixed thoroughly with a sterile spatula. Two  
12 aliquots of 0.3g will be transferred to DNA extraction buffer for molecular analysis. Three aliquots  
13 of 1.8 mL will be biobanked at -80°C. DNA will be extracted using established methods (31). Total  
14 bacterial load will be measured by quantitative PCR of the 16S rRNA gene. Microbial community  
15 profiling will be carried out by amplification and paired-end Illumina sequencing of the v3-v4 region  
16 of the 16S rRNA gene for bacteria (31, 32) and the Internal Transcribed Region of the ribosomal  
17 genes (ITS) for fungi (33). Microbiome profiles will be processed through in house bioinformatic  
18 pipelines (34) incorporating dada2 (35) to generate amplicon sequence variants (ASVs). As  
19 sequencing and library construction costs decrease, it will be feasible to carry out shotgun  
20 metagenomics on a significant portion of the stool samples. Metagenomic sequencing libraries will  
21 be constructed using NEBNext Ultra DNA Library kits with modifications to reduce reaction  
22 volume. Libraries will be sequenced to ~15,000,000 reads per sample (150nt paired-end) on an  
23 Illumina NovaSeq. After filtering and trimming for sequence quality and primer removal, DeconSeq  
24 (36) will be performed on the remaining reads in order to remove reads of human DNA. Genes and  
25 functional predictions and comparisons across sample groups will be computed using HUMAnN2  
26 (37) and MetaPhlAn (38) for functional microbiome analysis.  
27  
28  
29  
30  
31  
32  
33  
34  
35  
36  
37  
38  
39  
40  
41  
42  
43  
44  
45  
46  
47  
48  
49  
50

51 Microbiome analysis will include  $\alpha$ -diversity metrics for each sample and  $\beta$ -diversity measures  
52 (weighted and unweighted unifracs, Bray-Curtis, nonmetric multidimensional scaling) and other  
53  
54  
55  
56  
57  
58  
59  
60

1  
2  
3 statistical analysis using PhyloSeq and R (39). Using generalized linear mixed models (GLMM), we  
4 will identify microbial taxa and/or genes associated with disease phenotypes/progression, response  
5 to treatment, genotype, diet and other measured parameters. The large number of samples will also  
6 allow for application of machine learning methods such random forest and support vector machine  
7 methods (40, 41).  
8  
9  
10  
11  
12  
13  
14  
15  
16

### 17 ***Metabolomics Processing and Analyses***

18  
19 Urinary metabolomic profiles will be determined and analyzed together with microbial and dietary  
20 profiles to identify relationships and associations with disease status and clinical  
21 phenotypes/response to therapies. Urinary metabolic profiles will be analyzed by <sup>1</sup>H-NMR on a 4-  
22 channel Varian INOVA 600 MHz NMR spectrometer. Assignment of endogenous urinary  
23 metabolites will be done using Chenomx NMR Suite 8.5 (Chenomx Inc, Edmonton, Canada) and  
24 online databases (HMDB) (42). Metabolite concentrations will be log<sub>10</sub> transformed to normalize  
25 data prior to statistical analyses. Metabolome association study analyses will be done using multiple  
26 linear regression models in the R Project for Statistical Computing (R program). Projection-based  
27 principal component analysis (PCA), partial least-squares discriminant analysis (PLS-DA),  
28 orthogonal partial-least squares (OPLS) analysis will be performed using R program.  
29  
30  
31  
32  
33  
34  
35  
36  
37  
38  
39  
40  
41  
42  
43  
44

### 45 ***Genetic Analyses***

46  
47 In terms of genetic analyses, genomic DNA samples will be tested using two different approaches:  
48  
49 1) genome-wide genotyping to capture common genetic variation and enable genome-wide  
50 association studies (GWAS) and 2) whole exome sequencing (WES) will primarily be used to  
51 capture rare genetic variation and identify non-synonymous coding variants as potential causal  
52  
53  
54  
55  
56  
57  
58  
59  
60

1  
2  
3 variants. Both datasets will be used to identify genetic risk variants associated with disease status or  
4 clinical phenotypes/outcomes detailed above (e.g. response to therapy); both as previously described  
5 (43, 44, 45, 46). These data will also be used to impute the genetic variation at the highly  
6 polymorphic Human Leukocyte Antigens (HLA) and Killer cell Immunoglobulin-like Receptor  
7 (KIR) genes (47, 48), as these are key determinants of the host's immune response and genetic risk  
8 factors for many inflammatory diseases.  
9

10  
11 For the statistical analyses, following rigorous quality control of the genotype/sequence data, whole  
12 genome imputation of the dataset using a relevant public reference panel (e.g. 1000 Genomes,  
13 Haplotype Reference Panel, TOPMed, etc.) (49, 50) will be performed followed by principal  
14 components analysis (PCA). Principal components will be tested for phenotype association (using  
15 logistic regression with study indicator variables included as covariates) and evaluated for their  
16 impact on the genome-wide test statistics using  $\lambda$  (the genomic control inflation factor based on the  
17 median  $\chi^2$ ) after genome-wide association of the specified principal component. Association testing  
18 as well as binary and linear genotype–phenotype analyses will be done with PLINK and  
19 multinomial and ordinal regression analyses with a custom program, Trinculo. Survival analysis and  
20 risk prediction will be done with R using the packages “survival” and “Mangrove”, respectively. For  
21 integrated biomarker discovery (51), this genetic data will also be integrated with other biomarker  
22 data generated from the various IMAGINE platforms, in order to select those that estimate a large  
23 association with clinical outcomes (e.g. response to therapy), in order to create the best subset of  
24 predictors. Variable selection will be based on mathematical criteria for model selection, i.e., the  
25 Bayesian Information Criteria (BIC), and expert a priori (e.g., clinical knowledge, preliminary  
26 evidence). The selection of the model will be in the context of logistic regression, using the  
27  
28  
29  
30  
31  
32  
33  
34  
35  
36  
37  
38  
39  
40  
41  
42  
43  
44  
45  
46  
47  
48  
49  
50  
51  
52  
53  
54  
55  
56  
57  
58  
59  
60

1  
2  
3 candidate biomarkers as covariates and drug response (positive or negative) as the outcome. The  
4  
5 BIC has been proven to lead to less over-fitting of the model to data compared to other less  
6  
7 conservative approaches (52). This will reduce type-I errors and lead to increased robustness of the  
8  
9 results.  
10

### 11 12 13 *Subgroup Analyses* 14

15  
16 There are a number of subgroup analyses planned. In particular, we will analyze the primary and  
17  
18 secondary outcomes by sex. We will strive to ensure representative enrollment of men and women  
19  
20 with a wide range of life experience and at different life stages. When women are surveyed or  
21  
22 otherwise evaluated, we will take note of past, anticipated and ongoing pregnancies, obtain a  
23  
24 menstrual history, and use instruments that are sensitive to the influence of gender on outcomes.  
25  
26

27  
28  
29 The pediatric population (IBD cases aged 4-18 years of age) is also an important group to study. All  
30  
31 the primary and secondary outcomes described above will also be evaluated specifically in the  
32  
33 pediatric population. This includes predictors of success and failure of therapy for IBD. Children  
34  
35 developing IBD are predominantly treated from the time of first presentation at academic centres  
36  
37 rather than in community practice. Hence the pediatric collaborators in this proposal offer access to  
38  
39 the broad spectrum of IBD, including prior to alteration of the microbiome by any therapy. We will  
40  
41 evaluate predictors of success and failure of these therapies for IBD over time in the pediatric  
42  
43 population.  
44  
45  
46  
47  
48  
49

50 We will evaluate subtypes of IBS; constipation predominant, diarrhea predominant and mixed  
51  
52 patterns. We will assess the microbiome, metabolomics, genetic, demographic and dietary predictors  
53  
54 of response to therapies for IBS. Predictors of response to a low FODMAPs diet will help inform a  
55  
56  
57  
58  
59

1  
2  
3 RCT of low FODMAPs diet in IBS, and in particular we will evaluate whether responders are more  
4 likely to initially be taking a diet that is very rich in FODMAPs and how this response relates to  
5 their microbiome compositional and functional changes, affected by diets. A subgroup analysis will  
6 be performed of those between the ages of 13 to 17 compared to adult patients. We will also  
7 evaluate those with stable celiac disease and compare results to those without this disorder.  
8  
9  
10  
11  
12  
13  
14  
15  
16

## 17 **DISSEMINATION**

18  
19 Our approach to dissemination involves developing evidence-based knowledge translation initiatives  
20 for research that is ready for prime time – for each of category of our three research partners  
21 (patient, clinicians and policymakers). For patients, we plan to create a ‘white label’ version of the  
22 McMaster Optimal Aging Portal (<https://www.mcmasteroptimalaging.org>) that focuses specifically  
23 on supporting self-management and more generally informed decision-making for GI disease. This  
24 involves 1) identifying existing Evidence Summaries and preparing new ones to provide patients  
25 with the key messages from scientific research (typically high-quality systematic reviews) that's  
26 ready to be acted on; 2) identifying existing Web Resource Ratings and preparing new ones to help  
27 patients identify the free health resources on the internet that are based on scientific research; 3)  
28 identifying existing Blog Posts and preparing new ones that provide commentaries for patients about  
29 on what the scientific research on a topic actually means and on why good science matters; and 4)  
30 identifying existing patient decision aids to help patients (and clinicians working with patients) to  
31 engage in shared decision-making.  
32  
33  
34  
35  
36  
37  
38  
39  
40  
41  
42  
43  
44  
45  
46  
47  
48  
49  
50

51 We will work with network partners (e.g. CDHF and CCC) to determine the best online platform for  
52 patient-focused products, to develop inclusion criteria, and to ensure that their online resources  
53  
54  
55  
56  
57  
58  
59  
60

1  
2  
3 focused on GI disease meet the high standard necessary to be captured and ranked highly in the Web  
4  
5 Resource Ratings. We plan to prepare 52 new Evidence Summaries, 24 Blog Posts, and 400 Web  
6  
7 Resources Ratings for the 'white label' portal. We will also be working with network partners to  
8  
9 ensure high rates of use of the white-label, GI disease-focused content site for patients.  
10  
11  
12  
13

14  
15 The patients, family members and caregivers who live with the chronic conditions covered by the  
16  
17 IMAGINE Network will be able to use the portal to find information that aids them in managing  
18  
19 their conditions and making related health decisions. The content produced by the McMaster  
20  
21 Optimal Aging Portal has been shown to be effective in informing health consumers of quality health  
22  
23 information related to aging but not other domains. We plan to conduct a randomized controlled  
24  
25 trial (which will be detailed in a separate protocol) to assess how the online resources for patients,  
26  
27 provided through the white label website, changes patient behaviour in regards to using information  
28  
29 and making evidence-informed health decisions.  
30  
31  
32  
33

34  
35 For clinicians, we will follow an approach that emerged from a comprehensive review of the  
36  
37 literature on scaling up effective clinical interventions (summarized in an evidence brief) (53) and a  
38  
39 stakeholder dialogue involving the key policymakers, stakeholders and researchers focused on  
40  
41 supporting scale up of effective clinical practices in Ontario (summarized in a dialogue summary)  
42  
43 (54): 1) supporting dynamic efforts to identify GI disease-related clinical practices to be optimized  
44  
45 and the causes of underlying problems, using both empirical approaches like systematic reviews and  
46  
47 theoretical approaches like the Behaviour Change Wheel and the Theoretical Domains Framework;  
48  
49 2) using rigorous processes to select and implement approaches to optimizing clinical practices that  
50  
51 address the underlying causes of problems (e.g., audit and feedback, financial incentives; and 3)  
52  
53  
54  
55  
56  
57  
58  
59  
60

1  
2  
3 monitoring, evaluating and reviewing the approaches selected to optimize clinical practices. We plan  
4 to support two approaches: 1) prioritizing clinical interventions to be scaled up by engaging network  
5 members using an explicit process; and 2) scaling up effective clinical interventions by developing  
6 and executing a scale-up plan, both of which will build on what has been learned from related work  
7 at the McMaster Health Forum, and will rely on the frequent engagement of key members of the  
8 IMAGINE SPOR Network in doing so.  
9  
10  
11  
12  
13  
14  
15  
16  
17  
18

19 For policymakers, we will use our tried and tested approach to supporting evidence-informed  
20 policymaking, which means: 1) preparing an evidence brief on a pressing need for scale-up and the  
21 factors hindering that achievement (e.g., nurses' scope of practice, existing financial incentives, lack  
22 of multidisciplinary teams), options for scaling up, and key implementation considerations (which  
23 includes an equity lens brought to bear on particularly vulnerable groups); 2) convening a  
24 stakeholder dialogue that brings together key policymakers, patient and clinical leaders and  
25 researchers who can consider the research evidence alongside the other factors that drive decision-  
26 making; and 3) preparing a dialogue summary, disseminating the evidence brief and dialogue  
27 summary, conducting personalized briefings to senior leaders in the system, and supporting their  
28 efforts to act on what they learned.  
29  
30  
31  
32  
33  
34  
35  
36  
37  
38  
39  
40  
41  
42  
43  
44

45 We will enhance this approach by convening [citizen panels](#) to capture the insights and values of a  
46 diverse group of citizens, with different types of lived experience with the issue at hand, in a panel  
47 summary, the key messages of which would be included in the evidence brief informing the  
48 stakeholder dialogue. We plan to address two topics using this approach, one focused on reducing  
49 emergency-department usage in people with IBD, and one focused on framing the work led by  
50  
51  
52  
53  
54  
55  
56  
57  
58  
59  
60



1  
2  
3 IMAGINE in the context of rapid learning health systems for specific conditions (including those  
4 addressed by the IMAGINE Network). For each topic we will conduct consultations with a steering  
5 committee and key informants to define the terms of reference for evidence briefs, identify  
6 stakeholders and potential dialogue invitees, and review the outputs (briefs, summaries, and  
7 evaluation reports).

## 16 17 **ARTICLE SUMMARY**

### 18 19 **Strengths**

20  
21 Studies that have evaluated the microbiome in IBS (18) and IBD (19) have been small and  
22 underpowered. These studies usually did not evaluate disease phenotype in detail and have not  
23 assessed diet (18, 19), which can be an important effect modifier (55). This will be the largest  
24 observational study published to date that is sufficiently powered to evaluate the microbiome in IBS  
25 and IBD. All relevant confounding factors and effect modifiers will be captured and followed over  
26 time and longitudinally, which will allow a better understanding of what drives exacerbations of  
27 both IBS and IBD given that these are chronic relapsing and remitting diseases. The other strength  
28 of the study is the multidisciplinary team that makes up the IMAGINE Network. In particular, the  
29 collaboration between psychiatry and gastroenterology allows a careful evaluation of gut brain  
30 connections (17) and in particular how the gut microbiome (56) may impact on anxiety and  
31 depression in patients with IBD and IBS. Another key component of the multidisciplinary team is  
32 the level of patient engagement throughout the proposal. This is a Canadian Institute of Health  
33 Research funded grant through the SPOR initiative mandating that priorities are set by patients and  
34 they have input into study design. To date, we have 19 patient partners as part of the IMAGINE  
35  
36  
37  
38  
39  
40  
41  
42  
43  
44  
45  
46  
47  
48  
49  
50  
51  
52  
53  
54  
55  
56  
57  
58  
59  
60

1  
2  
3 Network and many are involved in the MAGIC cohort study. This strengthens the research, making  
4  
5 it more patient focused, and supports knowledge translation of the findings to patients.  
6  
7  
8  
9

## 10 **Limitations**

11  
12 This study is observational so any associations found may not relate to the causes of IBS and IBD.  
13  
14 We will rigorously control for confounding factors and but cannot control for unknown confounders  
15  
16 and so cannot draw causal inferences from the data. The MAGIC study will therefore be hypothesis  
17  
18 generating and any data relating to the microbiome or diet is likely to need confirmation in  
19  
20 randomized controlled trials (RCTs). The IMAGINE Network is committed to develop RCTs to  
21  
22 further investigate any promising findings from the MAGIC cohort study. This is the largest study  
23  
24 evaluating IBS and IBD, but the data that will be collected is enormous and so any results related to  
25  
26 the secondary outcomes of the study need to be interpreted with caution. The adjustment for  
27  
28 multiple testing is for the primary outcomes only and given the number of other outcomes that can  
29  
30 be evaluated with the data that is generated, it is important to realize that any positive results from  
31  
32 the secondary outcomes could be a chance finding related to multiple testing. We will highlight this  
33  
34 when reporting the data of more exploratory outcomes being studied. Despite these caveats, the  
35  
36 MAGIC study will provide valuable insight into the etiology of IBS and IBD as well as associated  
37  
38 psychiatric disorders. Data from this study will also provide strategies for personalized medicine  
39  
40 approaches to manage these diseases more effectively.  
41  
42  
43  
44  
45  
46  
47  
48

## 49 **ACKNOWLEDGEMENTS**

50  
51 We are grateful to Glenda MacQueen for all the support she gave to the IMAGINE Network and the  
52  
53 MAGIC study. Her advice was invaluable throughout this project and she will be missed by all of  
54  
55  
56  
57  
58  
59  
60

1  
2  
3 us. We are grateful to all our patient partners and everyone within the IMAGINE Network (see  
4  
5 Appendix 1).  
6  
7  
8  
9

## 10 **FUNDING SOURCES**

11  
12 The IMAGINE Network is supported by a grant from the Canadian Institute of Health Research  
13  
14 (Funding Reference Number: 1715-000-001) with funding from several partners. Funding was  
15  
16 matched by McMaster University, University of Calgary, University of Alberta, Queen's University,  
17  
18 Dalhousie University, Montreal Heart Institute Research Centre, Takeda Pharmaceutical Company,  
19  
20 Allergan Incorporated, Alberta Innovates, Research Manitoba, Crohn's and Colitis Canada.  
21  
22  
23  
24  
25

## 26 **DISCLOSURES**

27  
28 Dr. Moayyedi holds the Audrey Campbell Chair in Ulcerative Colitis Research. Drs. Moayyedi,  
29  
30 Bercik and Aida Fernandes have no conflicts of interest.  
31  
32

33 Dr. Bernstein is supported in part by the Bingham Chair in Gastroenterology. He is on Advisory  
34  
35 Boards for AbbVie Canada, Janssen Canada, Takeda Canada, Pfizer Canada. He is a Consultant for  
36  
37 Mylan Pharmaceuticals. He is receiving educational grants from AbbVie Canada, Pfizer Canada,  
38  
39 Shire Canada, Takeda Canada, Janssen Canada. Speaker's panel for AbbVie Canada, Janssen  
40  
41 Canada, Takeda Canada, and Medtronic Canada. Received research funding from AbbVie Canada.  
42  
43  
44

45 Dr. Rioux receives research funding from Pfizer Inc.  
46

47 Dr. Dieleman is on the Advisory Boards for Janssen Canada, AbbVie Canada, Pfizer Canada and  
48  
49 Takeda Canada.  
50  
51  
52  
53  
54  
55  
56  
57  
58  
59  
60

Dr. Marshall holds a Canada Research Chair (2008-18) and the Arthur J.E. Child Chair and receives travel reimbursement through Illumina for meetings of the Global Economics and Evaluation of Clinical Genomics Sequencing Working Group.

Dr. Vanner was supported by an Educational grant from Allergan.

Sandra Zelinsky is a patient research partner and received a grant from Takeda Canada.

### Data Statement

Technical appendix, statistical code, and dataset will be available from a repository (e.g. Dryad data repository) once follow up is complete and main analyses have been published.

### Author Statement & Contact Information

All authors have contributed to the conception and design of the protocol. Paul Moayyedi and Aida Fernandes constructed the first draft of the article which was significantly revised by all other authors. All authors have given final approval of the version submitted for publication. Paul Moayyedi acts as guarantor for the article.

| Author                                 | Contact Information                                                                                       |
|----------------------------------------|-----------------------------------------------------------------------------------------------------------|
| Corresponding Author:<br>Paul Moayyedi | 1280 Main St. W. HSC 3V3<br>Hamilton, ON Canada, L8S 4K1<br>(905) 521 2100 x.76764<br>moayyep@mcmaster.ca |
| Glenda MacQueen                        | Post-humous                                                                                               |
| Charles N Bernstein                    | Charles.Bernstein@umanitoba.ca                                                                            |
| Stephen Vanner                         | <a href="mailto:vanners@hdh.kari.net">vanners@hdh.kari.net</a>                                            |
| Premysl Bercik                         | <a href="mailto:bercikip@mcmaster.ca">bercikip@mcmaster.ca</a>                                            |
| Karen L Madsen                         | <a href="mailto:karen.madsen@ualberta.ca">karen.madsen@ualberta.ca</a>                                    |
| Michael G Surette                      | <a href="mailto:surette@mcmaster.ca">surette@mcmaster.ca</a>                                              |
| John D Rioux                           | <a href="mailto:john.rioux@inflammgen.org">john.rioux@inflammgen.org</a>                                  |
| Levinus A. Dieleman                    | <a href="mailto:l.dieleman@ualberta.ca">l.dieleman@ualberta.ca</a>                                        |
| Elena F Verdu                          | <a href="mailto:verdue@mcmaster.ca">verdue@mcmaster.ca</a>                                                |
| Russel De Souza                        | <a href="mailto:rdesouz@mcmaster.ca">rdesouz@mcmaster.ca</a>                                              |
| Antony Otley                           | <a href="mailto:anthony.otley@dal.ca">anthony.otley@dal.ca</a>                                            |
| Laura Targownik                        | Laura.Targownik@sinaihealth.ca                                                                            |

|                  |                                                                  |
|------------------|------------------------------------------------------------------|
| John Lavis       | <a href="mailto:lavisj@mcmaster.ca">lavisj@mcmaster.ca</a>       |
| Deborah Marshall | <a href="mailto:damarsha@ucalgary.ca">damarsha@ucalgary.ca</a>   |
| Sandra Zelinsky  | <a href="mailto:sandraz.per@gmail.com">sandraz.per@gmail.com</a> |
| Aida Fernandes   | <a href="mailto:fernaa19@mcmaster.ca">fernaa19@mcmaster.ca</a>   |

**Word Count: 5,443**

## References

1. Thompson WG, Irvine EJ, Pare P, Ferrazzi S, Rance L. Functional Gastrointestinal Disease in Canada. *Dig Dis Sci* 2002; 47: 225-35.
2. Sperber AD, Bangdiwala SI, Drossman DA, Ghoshal UC, Simren M, Tack J, Whitehead WE, Dumitrascu DL, Fang X, Fukudo S, Kellow J, Okeke E, Quigley EM, Schmulson M, Whorwell P, Archampong T, Adibi P, Andresen V, Benninga MA, Bonaz B, Bor S, Fernandez LB, Choi SC, Corazziari ES, Francisconi C, Hani A, Lazebnik L, Lee YY, Mulak A, Rahman MM, Santos J, Setshedi M, Syam AF, Vanner S, Wong RK, Lopez-Colombo A, Costa V, Dickman R, Kanazawa M, Keshteli AH, Khatun R, Maleki I, Poitras P, Pratap N, Stefanyuk O, Thomson S, Zeevenhooven J, Palsson OS. Worldwide Prevalence and Burden of Functional Gastrointestinal Disorders, Results of Rome Foundation Global Study. *Gastroenterology*. 2020 Apr 12. pii: S0016-5085(20)30487-X. doi: 10.1053/j.gastro.2020.04.014. [Epub ahead of print]
3. Ng SC, Shi HY, Hamidi N et al. Worldwide incidence and prevalence of inflammatory bowel disease in the 21st century: a systematic review of population-based studies. *Lancet* 2017; 390: 2769-78.
4. Brandt LJ, Chey WD, Foxx-Orenstein AE, Quigley EMM, Schiller LR, Schoenfeld PS, Spiegel BM, Talley NJ, Moayyedi P. An evidence-based position statement on the

- 1  
2  
3 management of irritable bowel syndrome. *American Journal of Gastroenterology* 2009; 104  
4  
5 (suppl 1): S1-S36.  
6  
7  
8 5. Talley NJ, Abreu MT, Achkar JP, Bernstein CN, Dubinsky MC, Hanauer SB, Kane SV,  
9  
10 Sandborn WJ, Ullman TA, Moayyedi P. An evidence-based systematic review on medical  
11  
12 therapies in inflammatory bowel disease. *Am J Gastroenterol* 2011; 106 suppl 1: S2-S25.  
13  
14  
15 6. Gralnek IM, Hays RD, Kilbourne A, Naliboff B, Mayer EA. The Impact of Irritable Bowel  
16  
17 Syndrome on Health-Related Quality of Life. *Gastroenterology* 2000; 119: 654-60.  
18  
19  
20 7. Casellas F, Lopez-Vivancos J, Badia X et al. Influence of inflammatory bowel disease on  
21  
22 different dimensions of quality of life. *Eur J Gastroenterol Hepatol* 2001;13:567–72.  
23  
24  
25 8. Bernstein CN, Loftus EV, Ng SC, Lakatos PL, Mowm B. Hospitalisations and surgery in  
26  
27 Crohn's disease. *Gut* 2012; 61: 622-9.  
28  
29  
30 9. Peery AF, Crockett SD, Barritt AS, Dellon ES, Eluri S, Gangarosa LM, Jensen ET, Lund JL,  
31  
32 Pasricha S, Runge T, Schmidt M, Shaheen NJ, Sandler RS. Burden of Gastrointestinal,  
33  
34 Liver, and Pancreatic Diseases in the United States *Gastroenterology* 2015; 149:1731–1741.  
35  
36  
37 10. Lee C, Doo E, Choi JM, et al. The Increased Level of Depression and Anxiety in Irritable  
38  
39 Bowel Syndrome Patients Compared with Healthy Controls: Systematic Review and Meta-  
40  
41 analysis. *J Neurogastroenterol Motil.* 2017;23(3):349–362. doi:10.5056/jnm16220  
42  
43  
44 11. Mikocka-Walus A, Knowles SR, Keefer L, Graff L. Controversies Revisited: A Systematic  
45  
46 Review of the Comorbidity of Depression and Anxiety with Inflammatory Bowel  
47  
48 Diseases, *Inflammatory Bowel Diseases*, Volume 22, Issue 3, 1 March 2016; 752–762.  
49  
50  
51 12. Jones R, Latinovic R, Charlton J, Gulliford M. Physical and psychological co-morbidity in  
52  
53 irritable bowel syndrome: a matched cohort study using the General Practice Research  
54  
55 Database. *Aliment Pharmacol Therap* 2006; 24: 879-86.  
56  
57  
58  
59  
60

- 1  
2  
3 13. Roy-Byrne PP, Davidson KW, Kessler RC, Asmundson GJ, Goodwin RD et al. Anxiety  
4  
5 disorders and comorbid medical illness. *Gen Hosp Psych* 2008; 30: 208-25.  
6  
7
- 8 14. Ford AC, Moayyedi P, Lacy BE, Lembo AJ, Saito YA, Schiller LR, Soffer EE, Spiegel  
9  
10 BMR, Quigley EMM. American College of Gastroenterology Monograph on the  
11  
12 management of irritable bowel syndrome and chronic idiopathic constipation. *American*  
13  
14 *Journal of Gastroenterology* 2014; 109: S1-S26.  
15  
16
- 17 15. Moayyedi P, Simren M, Bercik P. Evidence-based and mechanistic insights into exclusion  
18  
19 diets for IBS. *Nature Reviews Gastroenterology & Hepatology* 2020 epub  
20  
21 DOI: 10.1038/s41575-020-0270-3.  
22  
23
- 24 16. Moayyedi P. Update on fecal microbiota transplantation in patients with inflammatory  
25  
26 bowel disease. *Gastroenterology and Hepatology* 2018; 14: 319-22.  
27  
28
- 29 17. MacQueen G, Surette M, Moayyedi P. The gut microbiome and psychiatric illness. *Journal*  
30  
31 *of Psychiatry and Neuroscience* 2017; 42: 75-7.  
32  
33
- 34 18. Pittayanon R, Lau JT, Yuan Y, Leontiadis GI, Tse F, Surette M, Moayyedi P. Gut  
35  
36 microbiota in patients with irritable bowel syndrome – a systematic review.  
37  
38 *Gastroenterology* 2019; 157: 97-108.  
39
- 40 19. Pittayanon R, Lau JT, Yuan Y, Leontiadis GI, Tse F, Surette M, Moayyedi P. Gut  
41  
42 microbiota in patients with inflammatory bowel disease – a systematic review.  
43  
44 *Gastroenterology* 2020; in press.  
45  
46
- 47 20. [www.imaginespor.com](http://www.imaginespor.com)  
48
- 49 21. Palsson OS, Whitehead WE, van Tilburg MAL, Chang L, Chey W, Crowell MD, Keefer L,  
50  
51 Lembo AJ, Parkman HP, Rao SSC, Sperber A, Spiegel B, Tack J, Vanner S, Walker LS,  
52  
53  
54  
55  
56  
57  
58  
59  
60

- 1  
2  
3 Whorwell P, Yang Y; Development and Validation of the Rome IV Diagnostic  
4  
5 Questionnaire for Adults. *Gastroenterology* 2016; 150, Issue 6: 1481-1491.  
6  
7  
8 22. Satsangi J, Silverberg MS, Vermeire S, Colombel J-F. The Montreal classification of  
9  
10 inflammatory bowel disease: controversies, consensus, and implications. *Gut* 2006; 55: 749-  
11  
12 53.  
13  
14  
15 23. Levine A, Griffiths AM, Markowitz J, Wilson D, Turner D, Russell R, Fell J, Ruemmele F,  
16  
17 Walters T, Sherlock M, Dubinsky M, and Hyams JS. Pediatric Modification of the Montreal  
18  
19 Classification for Inflammatory Bowel Disease - the Paris Classification. *Inflamm Bowel Dis*  
20  
21 2011; 17: 1314-21.  
22  
23  
24 24. Ruemmele FM, Hyams JS, Otley A, Griffiths A, Kolho KL, Dias JA, Levine A, Escher  
25  
26 JC, Taminiu J, Veres G, Colombel JF, Vermeire S, Wilson DC, Turner D. Outcome  
27  
28 measures for clinical trials in paediatric IBD: an evidence-based, expert-driven practical  
29  
30 statement paper of the paediatric ECCO committee. *Gut*. 2015 Mar;64(3):438-46.  
31  
32  
33  
34  
35 25. Shklarov S, Marshall DA, Wasylak T, Marlett NJ. "Part of the Team": Mapping the outcomes  
36  
37 of training patients for new roles in health research and planning. *Health Expectations*, Dec  
38  
39 2017;20:1428-1436  
40  
41  
42 26. Marlett N, Shklarov S, Marshall DA, Santana MJ, Wasylak T. Building New Relationships in  
43  
44 Research: A Model of Patient Engagement Research. *Qual Life Res* 2015 May;24(5):1057-67.  
45  
46  
47 27. Moayyedi P, Surette MG, Kim PT, Libertucci J, Wolfe M, Onischi C, Armstrong D,  
48  
49 Marshall JK, Kassam Z, Reinisch W, Lee CH. Fecal Microbiota Transplantation Induces  
50  
51 Remission in Patients With Active Ulcerative Colitis in a Randomized Controlled  
52  
53 Trial. *Gastroenterology* 2015; 149: 102-9.  
54  
55  
56  
57  
58  
59  
60



- 1  
2  
3 28. Hu FB. Dietary pattern analysis: a new direction in nutritional epidemiology. *Curr Opin*  
4 *Lipidol* 2002; 13: 3-9.  
5  
6  
7  
8 29. Hu FB, Rimm EB, Stampfer MJ, Ascherio A, Spiegelman D, Willet WC. Prospective study  
9 of major dietary patterns and risk of coronary heart disease in men. *Am J Clin Nutr* 2000; 72:  
10 912-2.  
11  
12  
13  
14 30. Northstone K, Ness AR, Emmett PM, Rogers IS. Adjusting for energy intake in dietary  
15 pattern investigations using principal components analysis. *Eur J Clin Nutr* 2006; 62: 931-8.  
16  
17 113.  
18  
19  
20  
21 31. Lau JT, Whelan FJ, Herath I, Lee CH, Collins SM, Bercik P, Surette MG. Capturing the  
22 diversity of the human gut microbiota through culture-enriched molecular profiling. *Genome*  
23 *Med.* 2016 Jul 1;8(1):72.  
24  
25  
26  
27  
28 32. Woo TE<sup>1,2</sup>, Lim R<sup>2</sup>, Heirali AA<sup>3</sup>, Acosta N<sup>3</sup>, Rabin HR<sup>2,3</sup>, Mody CH, Somayaji R, Surette  
29 MG, Sibley CD, Storey DG, Parkins MD. A longitudinal characterization of the Non-Cystic  
30 Fibrosis Bronchiectasis airway microbiome. *Sci Rep.* 2019 May 3;9(1):6871. doi:  
31 10.1038/s41598-019-42862-y.  
32  
33  
34  
35  
36  
37 33. Xu J. Fungal DNA barcoding. *Genome.* 2016 Nov;59(11):913-932. Epub 2016 Aug 30.  
38  
39  
40 34. Whelan FJ<sup>1</sup>, Surette MG<sup>2,3</sup>. A comprehensive evaluation of the sl1p pipeline for 16S rRNA  
41 gene sequencing analysis. *Microbiome.* 2017 Aug 14;5(1): 100.  
42  
43  
44 35. Callahan BJ, McMurdie PJ, Rosen MJ, Han AW, Johnson AJ, Holmes SP. DADA2: High-  
45 resolution sample inference from Illumina amplicon data. *Nat Methods.* 2016 Jul;13(7):581-  
46 3. doi: 10.1038/nmeth.3869. Epub 2016 May 23.  
47  
48  
49  
50  
51  
52  
53  
54  
55  
56  
57  
58  
59  
60

- 1  
2  
3 36. Schmieder R, Edwards R. Fast identification and removal of sequence contamination from  
4 genomic and metagenomic datasets. *PLoS One*. 2011 Mar 9;6(3):e17288. doi:  
5  
6 10.1371/journal.pone.0017288.  
7  
8  
9  
10 37. Franzosa EA, McIver LJ, Rahnava G, Thompson LR, Schirmer M, Weingart G, Lipson  
11 KS, Knight R, Caporaso JG, Segata N, Huttenhower C. Species-level functional profiling of  
12 metagenomes and metatranscriptomes. *Nat Methods*. 2018 Nov;15(11):962-968. doi:  
13 10.1038/s41592-018-0176-y. Epub 2018 Oct 30.  
14  
15  
16  
17  
18 38. Segata N, Waldron L, Ballarini A, Narasimhan V, Jousson O, Huttenhower C. Metagenomic  
19 microbial community profiling using unique clade-specific marker genes. *Nat Methods*. 2012  
20 Jun 10;9(8):811-4. doi: 10.1038/nmeth.2066.  
21  
22  
23  
24  
25 39. McMurdie PJ, Holmes S. phyloseq: an R package for reproducible interactive analysis and  
26 graphics of microbiome census data. *PLoS One*. 2013 Apr 22;8(4):e61217. doi:  
27 10.1371/journal.pone.0061217. Print 2013.  
28  
29  
30  
31  
32 40. Qu K, Guo F, Liu X, Lin Y, Zou Q. Application of Machine Learning in Microbiology. *Front*  
33 *Microbiol*. 2019 Apr 18;10:827. doi: 10.3389/fmicb.2019.00827. eCollection 2019.  
34  
35  
36  
37 41. Camacho DM1, Collins KM2, Powers RK3, Costello JC4, Collins JJ5. Next-Generation  
38 Machine Learning for Biological Networks. *Cell*. 2018 Jun 14;173(7):1581-1592. doi:  
39 10.1016/j.cell.2018.05.015. Epub 2018 Jun 7.  
40  
41  
42  
43  
44 42. Wishart DS, Tzur D, Knox C, Eisner R, Guo AC, Young N, Cheng D, Jewell K, Arndt  
45 D, Sawhney S, Fung C, Nikolai L, Lewis M, Coutouly MA, Forsythe I, Tang P, Shrivastava  
46 S, Jeroncic K, Stothard P, Amegbey G, Block D, Hau DD, Wagner J, Miniaci J, Clements  
47 M, Gebremedhin M, Guo N, Zhang Y, Duggan GE, Macinnis GD, Weljie AM, Dowlatabadi  
48 R, Bamforth F, Clive D, Greiner R, Li L, Marrie T, Sykes BD, Vogel HJ, Querengesser L.  
49  
50  
51  
52  
53  
54  
55  
56  
57  
58  
59  
60

1  
2  
3 HMDB: the Human Metabolome Database. *Nucleic Acids Res.* 2007 Jan; 35(Database  
4  
5 issue): D521-6.  
6

- 7  
8 43. Anderson CA, Boucher G, Lees CW, Franke A, D'Amato M, Taylor KD, Lee JC, Goyette  
9  
10 P, Imielinski M, Latiano A, Lagacé C, Scott R, Amininejad L, Bumpstead S, Baidoo  
11  
12 L, Baldassano RN, Barclay M, Bayless TM, Brand S, Büning C, Colombel JF, Denson  
13  
14 LA, De Vos M, Dubinsky M, Edwards C, Ellinghaus D, Fehrmann RS, Floyd JA, Florin  
15  
16 T, Franchimont D, Franke L, Georges M, Glas J, Glazer NL, Guthery SL, Haritunians  
17  
18 T, Hayward NK, Hugot JP, Jobin G, Laukens D, Lawrance I, Lémann M, Levine  
19  
20 A, Libioulle C, Louis E, McGovern DP, Milla M, Montgomery GW, Morley KI, Mowat  
21  
22 C, Ng A, Newman W, Ophoff RA, Papi L, Palmieri O, Peyrin-Biroulet L, Panés J, Phillips  
23  
24 A, Prescott NJ, Proctor DD, Roberts R, Russell R, Rutgeerts P, Sanderson J, Sans  
25  
26 M, Schumm P, Seibold F, Sharma Y, Simms LA, Seielstad M, Steinhart AH, Targan SR, van  
27  
28 den Berg LH, Vatn M, Verspaget H, Walters T, Wijmenga C, Wilson DC, Westra HJ, Xavier  
29  
30 RJ, Zhao ZZ, Ponsioen CY, Andersen V, Torkvist L, Gazouli M, Anagnou NP, Karlsen  
31  
32 TH, Kupcinskas L, Sventoraityte J, Mansfield JC, Kugathasan S, Silverberg MS, Halfvarson  
33  
34 J, Rotter JI, Mathew CG, Griffiths AM, Gearry R, Ahmad T, Brant SR, Chamaillard  
35  
36 M, Satsangi J, Cho JH, Schreiber S, Daly MJ, Barrett JC, Parkes M, Annesse V, Hakonarson  
37  
38 H, Radford-Smith G, Duerr RH, Vermeire S, Weersma RK, Rioux JD. Meta-analysis  
39  
40 identifies 29 additional ulcerative colitis risk loci, increasing the number of confirmed  
41  
42 associations to 47. *Nat Genet.* 2011 Mar;43(3):246-52. doi: 10.1038/ng.764. Epub 2011 Feb  
43  
44 6.  
45  
46  
47  
48  
49

- 50  
51 44. Rivas MA, Avila BE, Koskela J, Huang H, Stevens C, Pirinen M, Haritunians T, Neale  
52  
53 BM, Kurki M, Ganna A, Graham D, Glaser B, Peter I, Atzmon G, Barzilai N, Levine  
54  
55  
56  
57  
58  
59

- 1  
2  
3 AP, Schiff E, Pontikos N, Weisburd B, Lek M, Karczewski KJ, Bloom J, Minikel  
4  
5 EV, Petersen BS, Beaugerie L<sup>14</sup>, Seksik P, Cosnes J, Schreiber S, Bokemeyer B, Bethge  
6  
7 J; International IBD Genetics Consortium; NIDDK IBD Genetics Consortium; T2D-GENES  
8  
9 Consortium, Heap G, Ahmad T, Plagnol V, Segal AW, Targan S, Turner D, Saavalainen  
10  
11 P, Farkkila M, Kontula K, Palotie A, Brant SR, Duerr RH, Silverberg MS, Rioux  
12  
13 JD, Weersma RK, Franke A, Jostins L, Anderson CA, Barrett JC, MacArthur DG, Jalas  
14  
15 C, Sokol H, Xavier RJ, Pulver A, Cho JH, McGovern DPB, Daly MJ. Insights into the  
16  
17 genetic epidemiology of Crohn's and rare diseases in the Ashkenazi Jewish population. *LoS*  
18  
19 *Genet.* 2018 May 24;14(5):e1007329. doi: 10.1371/journal.pgen.1007329. eCollection 2018  
20  
21 May.  
22  
23  
24  
25  
26 45. Huang H, Fang M, Jostins L, Umićević Mirkov M, Boucher G, Anderson CA, Andersen  
27  
28 V, Cleyngen I, Cortes A, Crins F, D'Amato M, Deffontaine V, Dmitrieva J, Docampo  
29  
30 E, Elansary M, Farh KK, Franke A, Gori AS, Goyette P, Halfvarson J, Haritunians T, Knight  
31  
32 J, Lawrance IC, Lees CW, Louis E, Mariman R, Meuwissen T, Mni M, Momozawa  
33  
34 Y, Parkes M, Spain SL, Théâtre E, Trynka G, Satsangi J, van Sommeren S, Vermeire  
35  
36 S, Xavier RJ; International Inflammatory Bowel Disease Genetics Consortium, Weersma  
37  
38 RK, Duerr RH, Mathew CG, Rioux JD, McGovern DPB, Cho JH, Georges M, Daly  
39  
40 MJ, Barrett JC. Fine-mapping inflammatory bowel disease loci to single-variant resolution.  
41  
42 *Nature.* 2017 Jul 13;547(7662):173-178. doi: 10.1038/nature22969. Epub 2017 Jun 28.  
43  
44  
45  
46  
47 46. Cleyngen I, Boucher G, Jostins L, Schumm LP, Zeissig S, Ahmad T, Andersen V, Andrews  
48  
49 JM, Annese V, Brand S, Brant SR, Cho JH, Daly MJ, Dubinsky M, Duerr RH, Ferguson  
50  
51 LR, Franke A, Geary RB, Goyette P, Hakonarson H, Halfvarson J, Hov JR, Huang  
52  
53 H, Kennedy NA, Kupcinskis L, Lawrance IC, Lee JC, Satsangi J, Schreiber S, Théâtre

- 1  
2  
3 E, van der Meulen-de Jong AE, Weersma RK, Wilson DC; International Inflammatory  
4 Bowel Disease Genetics Consortium, Parkes M, Vermeire S, Rioux JD, Mansfield  
5 J, Silverberg MS, Radford-Smith G, McGovern DP, Barrett JC, Lees CW. Inherited  
6 determinants of Crohn's disease and ulcerative colitis phenotypes: a genetic association  
7 study. *Lancet*. 2016 Jan 9;387(10014):156-67. doi: 10.1016/S0140-6736(15)00465-1. Epub  
8 2015 Oct 18.  
9  
10  
11  
12  
13  
14  
15  
16  
17 47. Goyette P, Boucher G, Mallon D, Ellinghaus E, Jostins L, Huang H, Ripke S, Gusareva  
18 ES, Annese V, Hauser SL, Oksenberg JR, Thomsen I, Leslie S; International Inflammatory  
19 Bowel Disease Genetics Consortium; Australia and New Zealand IBDGC; Belgium IBD  
20 Genetics Consortium; Italian Group for IBD Genetic Consortium; NIDDK Inflammatory  
21 Bowel Disease Genetics Consortium; United Kingdom IBDGC; Wellcome Trust Case  
22 Control Consortium; Quebec IBD Genetics Consortium, Daly MJ, Van Steen K, Duerr  
23 RH, Barrett JC, McGovern DP, Schumm LP, Traherne JA, Carrington MN, Kosmoliaptsis  
24 V, Karlsen TH, Franke A, Rioux JD. High-density mapping of the MHC identifies a shared  
25 role for HLA-DRB1\*01:03 in inflammatory bowel diseases and heterozygous advantage in  
26 ulcerative colitis. *Nat Genet*. 2015 Feb;47(2):172-9. doi: 10.1038/ng.3176. Epub 2015 Jan 5.  
27  
28  
29  
30  
31  
32  
33  
34  
35  
36  
37  
38  
39  
40 48. Vukcevic D, Traherne JA, Næss S, Ellinghaus E, Kamatani Y, Dilthey A Lathrop M, Karlsen  
41 TH, Franke A, Moffatt M, Cookson W, Trowsdale J, McVean G, Sawcer S, Leslie S.  
42 Imputation of KIR Types from SNP Variation Data. *Am J Hum Genet*. 2015 Oct  
43 1;97(4):593-607. doi: 10.1016/j.ajhg.2015.09.005.  
44  
45  
46  
47  
48  
49 49. Gourraud PA, Khankhanian P, Cereb N, Yang SY, Feolo M, Maiers M, Rioux JD, Hauser  
50 S, Oksenberg J. HLA diversity in the 1000 genomes dataset. *PLoS One*. 2014 Jul  
51 2;9(7):e97282. doi: 10.1371/journal.pone.0097282. eCollection 2014.  
52  
53  
54  
55  
56  
57  
58  
59  
60

- 1  
2  
3 50. Das S, Abecasis GR, Browning BL. Genotype Imputation from Large Reference Panels.  
4  
5 Annu Rev Genomics Hum Genet. 2018 Aug 31;19:73-96. doi: 10.1146/annurev-genom-  
6  
7 083117-021602. Epub 2018 May 23.  
8  
9
- 10 51. Ivison S, Des Rosiers C, Lesage S, Rioux JD, Levings MK. Biomarker-guided stratification  
11  
12 of autoimmune patients for biologic therapy. *Curr Opin Immunol*. 2017 Dec;49:56-63. doi:  
13  
14 10.1016/j.coi.2017.09.006. Epub 2017 Oct 17.  
15  
16
- 17 52. Gao, X.; Song, P. (2010). "Composite likelihood Bayesian information criteria for model  
18  
19 selection in high-dimensional data". *Journal of the American Statistical*  
20  
21 *Association*. 105 (492): 1531–1540. doi:10.1198/jasa.2010.tm09414.  
22  
23
- 24 53. Lavis JN, Wilson MG, Grimshaw JM. Evidence Brief: Optimizing Clinical Practice in  
25  
26 Ontario Based on Data, Evidence and Guidelines. Hamilton, Canada: McMaster Health  
27  
28 Forum, 6 March 2015.  
29  
30
- 31 54. Wilson MG, Lavis JN. Dialogue Summary: Optimizing Clinical Practice in Ontario Based on  
32  
33 Data, Evidence and Guidelines. Hamilton, Canada: McMaster Health Forum, 6 March 2015.  
34  
35
- 36 55. McIntosh K, Reed DE, Schneider T, Dang F, Keshteli AH, De Palma G, Madsen K, Bercik  
37  
38 P, Vanner S. FODMAPs alter symptoms and the metabolome of patients with IBS: a  
39  
40 randomised controlled trial. *Gut* 2017; 66: 1241-1251.  
41  
42
- 43 56. Bercik P, Collins SM, Verdu EF. Microbes and the gut-brain axis. *Neurogastroenterol Motil*  
44  
45 2012; 24: 405-13.  
46  
47  
48  
49  
50  
51  
52  
53  
54  
55  
56  
57  
58  
59  
60

**Table 1: Eligibility criteria**

| Type             | Inclusion Criteria                                                                                                                                                                                                                                                                                                                                                                                                                                                                                                                                                                                                                                                             | Exclusion Criteria                                                                                                                                                                                                                                                                                                                                                                                                                                                                                                                                                                                                                                               |
|------------------|--------------------------------------------------------------------------------------------------------------------------------------------------------------------------------------------------------------------------------------------------------------------------------------------------------------------------------------------------------------------------------------------------------------------------------------------------------------------------------------------------------------------------------------------------------------------------------------------------------------------------------------------------------------------------------|------------------------------------------------------------------------------------------------------------------------------------------------------------------------------------------------------------------------------------------------------------------------------------------------------------------------------------------------------------------------------------------------------------------------------------------------------------------------------------------------------------------------------------------------------------------------------------------------------------------------------------------------------------------|
| IBD              | Patients with documented CD, UC or IBD-U, >4 years old                                                                                                                                                                                                                                                                                                                                                                                                                                                                                                                                                                                                                         | <ul style="list-style-type: none"> <li>• subtotal colectomy and/or ileostomy patients</li> <li>• major comorbid condition where the projected survival is less than 5 years</li> <li>• difficulties with communication, including unable to communicate in English or French</li> <li>• diagnosis of schizophrenia</li> <li>• diagnosis of eating disorder</li> </ul>                                                                                                                                                                                                                                                                                            |
| IBS              | <p>Patients with IBS who have met Rome IV criteria, ≥13 years old</p> <p><b>IBS-D</b></p> <ul style="list-style-type: none"> <li>• Normal CBC</li> <li>• Negative tissue transglutaminase antibody if diarrhea the main symptom</li> <li>• Symptoms onset &gt; 45 years old, then negative colonic biopsies for microscopic colitis</li> </ul> <p><b>IBS-C, IBS-M &amp; IBS-U</b></p> <ul style="list-style-type: none"> <li>• Negative tissue transglutaminase antibody</li> <li>• Symptoms onset &gt; 50 years age, with new symptoms &lt; 1 year duration, then have a negative colonoscopy, CT colonography or Air Contrast Barium Enema.</li> <li>• Normal CBC</li> </ul> | <ul style="list-style-type: none"> <li>• major gastrointestinal surgery (Roux en y, bowel resection),</li> <li>• major comorbid condition, where the projected survival is less than 5 years</li> <li>• drug use that is the major cause of GI symptoms and/or undermines longitudinal compliance, including chronic antibiotic use, narcotic analgesics and substance abuse</li> <li>• narcotic analgesic use causing GI symptoms</li> <li>• difficulties with communication, including unable to communicate in English or French</li> <li>• diagnosis of schizophrenia</li> <li>• diagnosis of eating disorder</li> <li>• GI cancer within 5 years</li> </ul> |
| Healthy Controls | No gastrointestinal symptoms using the ROME IV Questionnaire                                                                                                                                                                                                                                                                                                                                                                                                                                                                                                                                                                                                                   | <ul style="list-style-type: none"> <li>• major gastrointestinal surgery (Roux en y, bowel resection)</li> <li>• any major comorbid chronic condition</li> <li>• difficulties with communication, including unable to communicate in English or French</li> <li>• diagnosis of schizophrenia</li> <li>• diagnosis of eating disorder</li> </ul>                                                                                                                                                                                                                                                                                                                   |

**Table 2: Participant Information Collection**

| Contact Purpose       | Screening period                             | 12-month visit                                | 24-month visit                                | 36-month visit                                 | 48-month visit                                |
|-----------------------|----------------------------------------------|-----------------------------------------------|-----------------------------------------------|------------------------------------------------|-----------------------------------------------|
|                       | <b>Enrol in Study</b>                        | Health status<br>Biosamples<br>Questionnaires | Health status<br>Biosamples<br>Questionnaires | Health status<br>Biosamples,<br>Questionnaires | Health status<br>Biosamples<br>Questionnaires |
| Information collected | Contact by telephone, email or clinic visit. | Signed consent                                | Medical history                               | Medical history                                | Medical history                               |
|                       | Explain project                              | Eligibility screening                         | Obtain urine, stool, blood                    | Obtain urine, stool, blood                     | Obtain urine, stool, blood                    |
|                       |                                              | Demographics                                  | Questionnaires                                | Questionnaires                                 | Questionnaires                                |
|                       | Set up study visit(s)                        | Medical history                               |                                               |                                                |                                               |
|                       |                                              | Provide urine & stool kit                     |                                               |                                                |                                               |
|                       | Obtain blood (+DNA)                          |                                               |                                               |                                                |                                               |
|                       | Questionnaires                               |                                               |                                               |                                                |                                               |



**Table 3: List of Patient-answered Questionnaires**

| SUBGROUP | ADULTS                                                                                                                                                                                                                                                                                                                                                                                                | PEDIATRICS                                                                                                                                                                                                                                                                                                                                 |
|----------|-------------------------------------------------------------------------------------------------------------------------------------------------------------------------------------------------------------------------------------------------------------------------------------------------------------------------------------------------------------------------------------------------------|--------------------------------------------------------------------------------------------------------------------------------------------------------------------------------------------------------------------------------------------------------------------------------------------------------------------------------------------|
| IBS      | <ul style="list-style-type: none"> <li>Demographic Questionnaire</li> </ul>                                                                                                                                                                                                                                                                                                                           | <ul style="list-style-type: none"> <li>Demographics (exclusions apply)</li> </ul>                                                                                                                                                                                                                                                          |
|          | <i>Disease Specific</i>                                                                                                                                                                                                                                                                                                                                                                               |                                                                                                                                                                                                                                                                                                                                            |
|          | <ul style="list-style-type: none"> <li>IBS Severity Score</li> </ul>                                                                                                                                                                                                                                                                                                                                  | <ul style="list-style-type: none"> <li>IBS Severity Score</li> <li>Rome IV Diagnostic Questionnaire</li> </ul>                                                                                                                                                                                                                             |
|          | <i>GI Symptoms</i>                                                                                                                                                                                                                                                                                                                                                                                    |                                                                                                                                                                                                                                                                                                                                            |
|          | <ul style="list-style-type: none"> <li>PROMIS Scale 5a – (GI Belly Pain)</li> <li>PROMIS Scale 6a – (GI Diarrhea)</li> <li>PROMIS Scale 9a – (GI Constipation)</li> <li>PROMIS Scale 13a – (GI Gas &amp; Bloating)</li> <li>Leeds Dyspepsia Questionnaire</li> </ul>                                                                                                                                  | <ul style="list-style-type: none"> <li>PedsQL GI Symptoms Scale- (stomach pain and hurt; discomfort when eating; heartburn &amp; reflux; nausea &amp; vomiting; gas &amp; bloating; constipation; blood in BM; diarrhea; worry about stomach aches; worry about BM) - Age 5-17</li> </ul>                                                  |
|          | <i>General Quality of Life</i>                                                                                                                                                                                                                                                                                                                                                                        |                                                                                                                                                                                                                                                                                                                                            |
|          | <ul style="list-style-type: none"> <li>Euro Quality of Life</li> </ul>                                                                                                                                                                                                                                                                                                                                | <ul style="list-style-type: none"> <li>Euro Quality of Life Youth - Age 8-15</li> <li>Euro Quality of Life 5 Level - Age 16 +</li> </ul>                                                                                                                                                                                                   |
|          | <i>Psychological</i>                                                                                                                                                                                                                                                                                                                                                                                  |                                                                                                                                                                                                                                                                                                                                            |
|          | <ul style="list-style-type: none"> <li>Patient Health Questionnaire</li> <li>PROMIS-29 – (Physical Function, Anxiety, Depression, Fatigue, Sleep Disturbance, Pain Interference &amp; Intensity)</li> <li>Generalized Anxiety Disorder (GAD-7)</li> <li>Perceived Stress Scale</li> <li>Adverse Childhood Experiences</li> <li>Brief Resiliency Survey</li> <li>Pain Catastrophizing Scale</li> </ul> | <ul style="list-style-type: none"> <li>PROMIS-25 - (Physical Function Mobility; Anxiety; Depressive Symptoms; Fatigue; Peer Relations; Pain Interference) - Age 5-17</li> <li>Brief Resiliency Survey - Age 12-17</li> <li>Pain Catastrophizing Scale - Age 8-17</li> <li>Revised Child Anxiety and Depression Scale - Age 6-17</li> </ul> |
|          | <i>Productivity</i>                                                                                                                                                                                                                                                                                                                                                                                   |                                                                                                                                                                                                                                                                                                                                            |
|          | <ul style="list-style-type: none"> <li>Work Productivity &amp; Activity Index</li> </ul>                                                                                                                                                                                                                                                                                                              |                                                                                                                                                                                                                                                                                                                                            |
|          | <i>Diet</i>                                                                                                                                                                                                                                                                                                                                                                                           |                                                                                                                                                                                                                                                                                                                                            |
|          | <ul style="list-style-type: none"> <li>Food Frequency Questionnaire</li> <li>FODMAP Questionnaire</li> </ul>                                                                                                                                                                                                                                                                                          | <ul style="list-style-type: none"> <li>Food Frequency Questionnaire</li> <li>FODMAP Questionnaire</li> </ul>                                                                                                                                                                                                                               |
| IBD      | <ul style="list-style-type: none"> <li>Demographic Questionnaire</li> </ul>                                                                                                                                                                                                                                                                                                                           | <ul style="list-style-type: none"> <li>Demographics (exclusions apply)</li> </ul>                                                                                                                                                                                                                                                          |
|          | <i>Disease Specific</i>                                                                                                                                                                                                                                                                                                                                                                               |                                                                                                                                                                                                                                                                                                                                            |

|                         |                                                                                                                                                                                                                                                                                                                                                                                                       |                                                                                                                                                                                                                                                                                                                                            |
|-------------------------|-------------------------------------------------------------------------------------------------------------------------------------------------------------------------------------------------------------------------------------------------------------------------------------------------------------------------------------------------------------------------------------------------------|--------------------------------------------------------------------------------------------------------------------------------------------------------------------------------------------------------------------------------------------------------------------------------------------------------------------------------------------|
|                         | <ul style="list-style-type: none"> <li>Short IBD Symptom Inventory</li> </ul>                                                                                                                                                                                                                                                                                                                         | <ul style="list-style-type: none"> <li>IMPACT – III - Ages 9-17</li> <li>PUCAI (UC); PCDAI (CD)</li> </ul>                                                                                                                                                                                                                                 |
|                         | <b>GI Symptoms</b>                                                                                                                                                                                                                                                                                                                                                                                    |                                                                                                                                                                                                                                                                                                                                            |
|                         | <ul style="list-style-type: none"> <li>PROMIS Scale 5a – (GI Belly Pain)</li> <li>PROMIS Scale 6a – (GI Diarrhea)</li> <li>PROMIS Scale 9a – (GI Constipation)</li> <li>PROMIS Scale 13a – (GI Gas &amp; Bloating)</li> <li>Leeds Dyspepsia Questionnaire</li> </ul>                                                                                                                                  | <ul style="list-style-type: none"> <li>PedsQL GI Symptoms Scale- (stomach pain and hurt; discomfort when eating; heartburn &amp; reflux; nausea &amp; vomiting; gas &amp; bloating; constipation; blood in BM; diarrhea; worry about stomach aches; worry about BM) - Age 4-17</li> </ul>                                                  |
|                         | <b>General Quality of Life</b>                                                                                                                                                                                                                                                                                                                                                                        |                                                                                                                                                                                                                                                                                                                                            |
|                         | <ul style="list-style-type: none"> <li>Euro Quality of Life</li> </ul>                                                                                                                                                                                                                                                                                                                                | <ul style="list-style-type: none"> <li>Euro Quality of Life Youth - Age 8-15</li> </ul>                                                                                                                                                                                                                                                    |
|                         | <b>Psychological</b>                                                                                                                                                                                                                                                                                                                                                                                  |                                                                                                                                                                                                                                                                                                                                            |
|                         | <ul style="list-style-type: none"> <li>Patient Health Questionnaire</li> <li>PROMIS-29 – (Physical Function, Anxiety, Depression, Fatigue, Sleep Disturbance, Pain Interference &amp; Intensity)</li> <li>Generalized Anxiety Disorder (GAD-7)</li> <li>Perceived Stress Scale</li> <li>Adverse Childhood Experiences</li> <li>Brief Resiliency Survey</li> <li>Pain Catastrophizing Scale</li> </ul> | <ul style="list-style-type: none"> <li>PROMIS-25 - (Physical Function Mobility; Anxiety; Depressive Symptoms; Fatigue; Peer Relations; Pain Interference) - Age 5-17</li> <li>Brief Resiliency Survey - Age 12-17</li> <li>Pain Catastrophizing Scale - Age 8-17</li> <li>Revised Child Anxiety and Depression Scale - Age 6-17</li> </ul> |
|                         | <b>Productivity</b>                                                                                                                                                                                                                                                                                                                                                                                   |                                                                                                                                                                                                                                                                                                                                            |
|                         | <ul style="list-style-type: none"> <li>Work Productivity &amp; Activity Index</li> </ul>                                                                                                                                                                                                                                                                                                              |                                                                                                                                                                                                                                                                                                                                            |
|                         | <b>Diet</b>                                                                                                                                                                                                                                                                                                                                                                                           |                                                                                                                                                                                                                                                                                                                                            |
|                         | <ul style="list-style-type: none"> <li>Food Frequency Questionnaire</li> <li>FODMAP Questionnaire</li> </ul>                                                                                                                                                                                                                                                                                          | <ul style="list-style-type: none"> <li>Food Frequency Questionnaire</li> <li>FODMAP Questionnaire</li> </ul>                                                                                                                                                                                                                               |
| <b>Healthy controls</b> | <ul style="list-style-type: none"> <li>Demographic Questionnaire</li> </ul>                                                                                                                                                                                                                                                                                                                           | <ul style="list-style-type: none"> <li>Demographics (exclusions apply)</li> </ul>                                                                                                                                                                                                                                                          |
|                         | <b>GI Symptoms</b>                                                                                                                                                                                                                                                                                                                                                                                    |                                                                                                                                                                                                                                                                                                                                            |
|                         | <ul style="list-style-type: none"> <li>PROMIS Scale 5a – (GI Belly Pain)</li> <li>PROMIS Scale 6a – (GI Diarrhea)</li> <li>PROMIS Scale 9a – (GI Constipation)</li> <li>PROMIS Scale 13a – (GI Gas &amp; Bloating)</li> <li>Leeds Dyspepsia Questionnaire</li> </ul>                                                                                                                                  | <ul style="list-style-type: none"> <li>PedsQL GI Symptoms Scale- (stomach pain and hurt; discomfort when eating; heartburn &amp; reflux; nausea &amp; vomiting; gas &amp; bloating; constipation; blood in BM; diarrhea; worry about stomach aches; worry about BM) Age 5-17</li> </ul>                                                    |
|                         | <b>General Quality of Life</b>                                                                                                                                                                                                                                                                                                                                                                        |                                                                                                                                                                                                                                                                                                                                            |
|                         | <ul style="list-style-type: none"> <li>Euro Quality of Life</li> </ul>                                                                                                                                                                                                                                                                                                                                | <ul style="list-style-type: none"> <li>Euro Quality of Life Youth - Age 8-15</li> <li>Euro Quality of Life 5 Level - Age 16 +</li> </ul>                                                                                                                                                                                                   |

|  |                                                                                                                                                                                                                                                                                                                                                                                                                     |                                                                                                                                                                                                                                                                                                                                                    |
|--|---------------------------------------------------------------------------------------------------------------------------------------------------------------------------------------------------------------------------------------------------------------------------------------------------------------------------------------------------------------------------------------------------------------------|----------------------------------------------------------------------------------------------------------------------------------------------------------------------------------------------------------------------------------------------------------------------------------------------------------------------------------------------------|
|  | <b><i>Psychological</i></b>                                                                                                                                                                                                                                                                                                                                                                                         |                                                                                                                                                                                                                                                                                                                                                    |
|  | <ul style="list-style-type: none"> <li>• Patient Health Questionnaire</li> <li>• PROMIS-29 – (Physical Function, Anxiety, Depression, Fatigue, Sleep Disturbance, Pain Interference &amp; Intensity)</li> <li>• Generalized Anxiety Disorder (GAD-7)</li> <li>• Perceived Stress Scale</li> <li>• Adverse Childhood Experiences</li> <li>• Brief Resiliency Survey</li> <li>• Pain Catastrophizing Scale</li> </ul> | <ul style="list-style-type: none"> <li>• PROMIS-25 - (Physical Function Mobility; Anxiety; Depressive Symptoms; Fatigue; Peer Relations; Pain Interference) - Age 5-17</li> <li>• Brief Resiliency Survey - Age 12-17</li> <li>• Pain Catastrophizing Scale - Age 8-17</li> <li>• Revised Child Anxiety and Depression Scale - Age 6-17</li> </ul> |
|  | <b><i>Productivity</i></b>                                                                                                                                                                                                                                                                                                                                                                                          |                                                                                                                                                                                                                                                                                                                                                    |
|  | <ul style="list-style-type: none"> <li>• Work Productivity &amp; Activity Index</li> </ul>                                                                                                                                                                                                                                                                                                                          |                                                                                                                                                                                                                                                                                                                                                    |
|  | <b><i>Diet</i></b>                                                                                                                                                                                                                                                                                                                                                                                                  |                                                                                                                                                                                                                                                                                                                                                    |
|  | <ul style="list-style-type: none"> <li>• Food Frequency Questionnaire</li> <li>• FODMAP Questionnaire</li> </ul>                                                                                                                                                                                                                                                                                                    | <ul style="list-style-type: none"> <li>• Food Frequency Questionnaire</li> <li>• FODMAP Questionnaire</li> </ul>                                                                                                                                                                                                                                   |

**APPENDIX 1: IMAGINE MEMBERS (alphabetically)****Hamilton:**

Premysl Bercik  
John Bienenstock  
Stephen Collins  
Russel de Souza  
Aida Fernandes (Executive Director)  
Benicio Frey  
Khurram Khan  
John Lavis  
Paul Moayyedi (PI)  
Nikil Pai  
Mary Sherlock  
Mike Surette  
Elena Verdu

**Calgary:**

Christopher Andrews  
Paul Beck  
Humberto Jijon  
Gilaad G. Kaplan  
Glenda MacQueen (post-humous)  
Deborah Marshall  
Yasmin Nasser  
Remo Panaccione  
Cynthia Seow  
Valerie Taylor

**Winnipeg:**

Charles Bernstein  
Wael El-Matary  
Patricia Furer  
Jean-Eric Ghia  
Lesley Graff  
Harminder Singh  
John Walker (post-humous)

**Edmonton:**

Leo Dieleman  
Richard Fedorak (post-humous)  
Hien Huynh  
Dina Kao  
Karen Madsen

1  
2  
3 Puneeta Tandon  
4 Eytan Wine  
5

6  
7 Kingston:  
8 David Reed  
9 Dean Tripp  
10 Stephen Vanner  
11  
12

13 Halifax:  
14 Jennifer Jones  
15 Anthony Otley  
16 Johan Van Limbergen  
17  
18

19 Montreal:  
20 Alain Bitton  
21 Justin Cote-Daigneault  
22 Christophe Faure  
23 Peter Lakatos  
24 John Rioux  
25 Sacha Sidani  
26  
27  
28

29 Toronto:  
30 Ken Croitoru  
31 Louis Liu  
32 Jeff Meyer  
33 Geoffrey Nguyen  
34 Laura Targownik  
35  
36

37 Ottawa:  
38 Eric Benchimol  
39 Sanjay Murthy  
40  
41

42 St John's:  
43 Mark Borgaonkar  
44  
45

46 Vancouver:  
47 Brian Bressler  
48  
49

50 **Patient Research Partners:**

51 Gail Bellissimo  
52 Sara Blake  
53 Kim Daley  
54 Alysia DeNino  
55 Anny Fernandez  
56  
57  
58  
59  
60

1  
2  
3 Shauna Jones  
4 Ellen Keunzig  
5 Sophie LeBlanc  
6 Nadine Mackay  
7 Lisa MacNeil  
8 Megan Marsiglio  
9 Kate Mason  
10 Adhiyat Najam  
11 Emma Neary  
12 Shawn Reynolds  
13 Perry Steckly  
14 Amy Van Engelen  
15 Karthika Yogaratnam  
16 Sandra Zelinsky  
17  
18  
19  
20  
21  
22  
23  
24  
25  
26  
27  
28  
29  
30  
31  
32  
33  
34  
35  
36  
37  
38  
39  
40  
41  
42  
43  
44  
45  
46  
47  
48  
49  
50  
51  
52  
53  
54  
55  
56  
57  
58  
59  
60

# BMJ Open

**IMAGINE Network's Mind And Gut Interactions Cohort  
(MAGIC) Study:  
A protocol for a prospective observational multi-centre  
cohort study in Inflammatory Bowel Disease & Irritable  
Bowel Syndrome**

|                                 |                                                                                                                                                                                                                                                                                                                                                                                                                                                                                                                                                                                                                                                                                                                                                                                                                                                                                                                                                                                                                                                                                                                                                                                                                                                               |
|---------------------------------|---------------------------------------------------------------------------------------------------------------------------------------------------------------------------------------------------------------------------------------------------------------------------------------------------------------------------------------------------------------------------------------------------------------------------------------------------------------------------------------------------------------------------------------------------------------------------------------------------------------------------------------------------------------------------------------------------------------------------------------------------------------------------------------------------------------------------------------------------------------------------------------------------------------------------------------------------------------------------------------------------------------------------------------------------------------------------------------------------------------------------------------------------------------------------------------------------------------------------------------------------------------|
| Journal:                        | <i>BMJ Open</i>                                                                                                                                                                                                                                                                                                                                                                                                                                                                                                                                                                                                                                                                                                                                                                                                                                                                                                                                                                                                                                                                                                                                                                                                                                               |
| Manuscript ID                   | bmjopen-2020-041733.R1                                                                                                                                                                                                                                                                                                                                                                                                                                                                                                                                                                                                                                                                                                                                                                                                                                                                                                                                                                                                                                                                                                                                                                                                                                        |
| Article Type:                   | Protocol                                                                                                                                                                                                                                                                                                                                                                                                                                                                                                                                                                                                                                                                                                                                                                                                                                                                                                                                                                                                                                                                                                                                                                                                                                                      |
| Date Submitted by the Author:   | 05-Sep-2020                                                                                                                                                                                                                                                                                                                                                                                                                                                                                                                                                                                                                                                                                                                                                                                                                                                                                                                                                                                                                                                                                                                                                                                                                                                   |
| Complete List of Authors:       | Moayyedi, Paul; McMaster University Faculty of Health Sciences, Medicine<br>MacQueen, Glenda; University of Calgary<br>Bernstein, Charles; University of Manitoba, Gastroenterology<br>Vanner, Stephen; Queen's University<br>Bercik, Premysl; McMaster University Faculty of Health Sciences, Medicine<br>Madsen, Karen; University of Alberta<br>Surette, Michael; McMaster University Faculty of Health Sciences<br>Rioux, John; Universite de Montreal<br>Dieleman, Levinus; University of Alberta Faculty of Medicine and Dentistry<br>Verdú, Elena; McMaster University Faculty of Health Sciences, Division of Gastroenterology<br>de Souza, Russell; McMaster University Faculty of Health Sciences, Department of Clinical Epidemiology & Biostatistics<br>Otley, Anthony; Dalhousie University<br>Targownik, Laura; Mount Sinai Hospital<br>Lavis, John; McMaster University Faculty of Health Sciences<br>Cunningham, Jennifer; McMaster University Faculty of Health Sciences, Population Health Research Institute<br>Marshall, Deborah; University of Calgary, Department of Community Health Sciences<br>Zelinsky, Sandra; University of Calgary, PaCER Innovates<br>Fernandes, Aida; McMaster University Faculty of Health Sciences, Medicine |
| <b>Primary Subject Heading</b>: | Gastroenterology and hepatology                                                                                                                                                                                                                                                                                                                                                                                                                                                                                                                                                                                                                                                                                                                                                                                                                                                                                                                                                                                                                                                                                                                                                                                                                               |
| Secondary Subject Heading:      | Genetics and genomics, Epidemiology, Mental health, Nutrition and metabolism, Immunology (including allergy)                                                                                                                                                                                                                                                                                                                                                                                                                                                                                                                                                                                                                                                                                                                                                                                                                                                                                                                                                                                                                                                                                                                                                  |
| Keywords:                       | Inflammatory bowel disease < GASTROENTEROLOGY, Functional bowel disorders < GASTROENTEROLOGY, Depression & mood disorders < PSYCHIATRY, Microbiology < NATURAL SCIENCE DISCIPLINES, Nutritional support < GASTROENTEROLOGY                                                                                                                                                                                                                                                                                                                                                                                                                                                                                                                                                                                                                                                                                                                                                                                                                                                                                                                                                                                                                                    |

1  
2  
3  
4  
5  
6  
7  
8  
9  
10  
11  
12  
13  
14  
15  
16  
17  
18  
19  
20  
21  
22  
23  
24  
25  
26  
27  
28  
29  
30  
31  
32  
33  
34  
35  
36  
37  
38  
39  
40  
41  
42  
43  
44  
45  
46  
47  
48  
49  
50  
51  
52  
53  
54  
55  
56  
57  
58  
59  
60

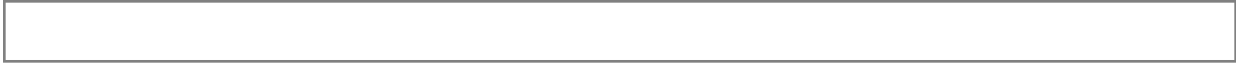

SCHOLARONE™  
Manuscripts



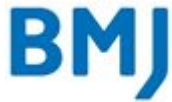

I, the Submitting Author has the right to grant and does grant on behalf of all authors of the Work (as defined in the below author licence), an exclusive licence and/or a non-exclusive licence for contributions from authors who are: i) UK Crown employees; ii) where BMJ has agreed a CC-BY licence shall apply, and/or iii) in accordance with the terms applicable for US Federal Government officers or employees acting as part of their official duties; on a worldwide, perpetual, irrevocable, royalty-free basis to BMJ Publishing Group Ltd ("BMJ") its licensees and where the relevant Journal is co-owned by BMJ to the co-owners of the Journal, to publish the Work in this journal and any other BMJ products and to exploit all rights, as set out in our [licence](#).

The Submitting Author accepts and understands that any supply made under these terms is made by BMJ to the Submitting Author unless you are acting as an employee on behalf of your employer or a postgraduate student of an affiliated institution which is paying any applicable article publishing charge ("APC") for Open Access articles. Where the Submitting Author wishes to make the Work available on an Open Access basis (and intends to pay the relevant APC), the terms of reuse of such Open Access shall be governed by a Creative Commons licence – details of these licences and which [Creative Commons](#) licence will apply to this Work are set out in our licence referred to above.

Other than as permitted in any relevant BMJ Author's Self Archiving Policies, I confirm this Work has not been accepted for publication elsewhere, is not being considered for publication elsewhere and does not duplicate material already published. I confirm all authors consent to publication of this Work and authorise the granting of this licence.

## IMAGINE Network's Mind And Gut Interactions Cohort (MAGIC) Study:

A protocol for a prospective observational multicentre cohort study in  
Inflammatory Bowel Disease & Irritable Bowel Syndrome

### Authors:

Paul Moayyedi<sup>1</sup>, Glenda MacQueen (post-humous)<sup>2</sup>, Charles N Bernstein<sup>3</sup>, Stephen Vanner<sup>4</sup>,  
Premysl Bercik<sup>1</sup>, Karen L Madsen<sup>5</sup>, Michael G Surette<sup>1</sup>, John D Rioux<sup>6,7</sup>, Levinus A. Dieleman<sup>5</sup>,  
Elena F Verdu<sup>1</sup>, Russell J. de Souza<sup>1</sup>, Anthony Otley<sup>8</sup>, Laura Targownik<sup>9</sup>, John Lavis<sup>10</sup>, Jennifer  
Cunningham<sup>11</sup>, Deborah Marshall<sup>2</sup>, Sandra Zelinsky<sup>2</sup>, Aida Fernandes<sup>1,2</sup>, on behalf of the IMAGINE  
Network

1. Farncombe Family Digestive Health Institute, McMaster University, Hamilton, ON, Canada
2. University of Calgary, AB, Canada
3. University of Manitoba, Winnipeg, MB, Canada
4. Queen's University, Kingston, ON, Canada
5. University of Alberta, Edmonton, AB, Canada (bercikp@mcmaster.ca)
6. Université de Montréal, Montréal, QC, Canada
7. Montreal Heart Institute, Montreal, QC, Canada
8. Dalhousie University, Halifax, NS, Canada
9. University of Toronto, ON, Canada
10. McMaster Health Forum, McMaster University, Hamilton, ON, Canada
11. Population Health Research Institute, Hamilton Health Sciences, McMaster University, Hamilton, On, Canada

### Corresponding Author:

Paul Moayyedi  
McMaster University Faculty of Health Sciences, Medicine  
Hamilton, ON, CAN  
Tel: 1 905 521 2100 x 76764  
Email: moayyep@mcmaster.ca

### Key Words:

Inflammatory bowel disease (IBD), irritable bowel syndrome (IBS), Crohn's disease, ulcerative colitis,  
prospective observational cohort, microbiome, diet, genetic, microbiome, metabolome

ClinicalTrials.gov Identifier: NCT03131414

**ABSTRACT (reduce to 250 words)**

**Introduction:** Gut microbiome and diet may be important in irritable bowel syndrome (IBS), inflammatory bowel disease (IBD), and comorbid psychiatric conditions but the mechanisms are unclear. We will create a large cohort of patients with IBS, IBD and healthy controls and follow them over time, collecting dietary and mental health information and biological samples, to assess their gastrointestinal (GI) and psychological symptoms in association with their diet, gut microbiome and metabolome.

**Methods and Analysis:** This five-year observational prospective cohort study is recruiting 8000 participants from 15 Canadian centers. Persons with IBS who are 13 years of age and older or IBD  $\geq$  5 years will be recruited. Healthy controls will be recruited from the general public and from friends or relatives of those with IBD or IBS who do not have GI symptoms. Participants answer surveys and provide blood, urine, and stool samples annually. Surveys assess disease activity, quality of life, physical pain, lifestyle factors, psychological status, and diet. The main outcomes evaluated will be the association between the diet, inflammatory, genetic, microbiome and metabolomic profiles in those with IBD and IBS compared with healthy controls using multivariate logistic regression. We will also compare these profiles in those with active versus quiescent disease and those with and without psychological comorbidity.

**Ethics and Dissemination:** Approval has been obtained from the institutional review boards of all centres taking part in the study. We will develop evidence-based knowledge translation initiatives for patients, clinicians and policy-makers to disseminate results to relevant stakeholders.

## Strengths and Limitations

- This is the largest observational study evaluating the microbiome in inflammatory bowel disease and irritable bowel syndrome.
- The patients' disease type and activity are well characterized with detailed information on diet and mental health.
- The degree of patient engagement is another strength of the study.
- The microbiome and diet assessment are conducted once per year and may not correlate with disease flare-ups.
- As with all observational studies, any association may not be causal and will need evaluation in randomized controlled trials.

## INTRODUCTION

Two thirds of the population experience significant gastrointestinal (GI) symptoms at some point in their life (1). One of the most common GI disorders is irritable bowel syndrome (IBS), affecting up to 10% of persons worldwide, depending on the definition (2). Another GI disorder that is associated with significant health care resources is inflammatory bowel disease (IBD) which affects approximately 0.3% of the world's industrialized population (3).

The cardinal features of IBS include chronic abdominal pain over 3 months per year related to a change in bowel habit and the disease can present at any age (2,4). IBD is a term encompassing two distinct but related diseases: ulcerative colitis (UC) and Crohn's disease (CD). The cardinal symptom of UC is bloody diarrhea whilst in CD abdominal pain is a more prominent symptom, but

1  
2  
3 diarrhea is a feature as well (5). IBD has the highest incidence in second and third decades of life  
4 and are lifelong relapsing and remitting diseases. Growth impairment can be an issue in children  
5  
6 with CD.  
7  
8  
9

10  
11  
12 Both IBS and IBD significantly impact quality of life (6, 7) and often surgery is needed in patients  
13 with IBD (8). IBS and IBD also account for significant health care spending in the developed world  
14 with many countries spending billions of dollars per annum (9). Persons with IBS and IBD have  
15 higher rates of anxiety and depression compared to the general population (10, 11) and those with  
16 other chronic diseases (12). The corollary is also true; persons with anxiety and depression have  
17 more GI symptoms compared to healthy controls (13). Therapy for IBS has traditionally focused on  
18 drugs that alter motility or visceral sensitivity of the GI tract and although various interventions are  
19 superior to placebo, the overall impact on symptoms is only modest (14). Therapy for IBD has  
20 traditionally focused on drugs that inhibit the exaggerated pro-inflammatory immune response,  
21 however only 50% of the patients achieve clinical remission, whereas clinical relapses are common.  
22  
23  
24  
25  
26  
27  
28  
29  
30  
31  
32  
33  
34  
35  
36  
37

38 There is evidence that the gut microbiome and diet are important in IBS (15), IBD (16), and  
39 comorbid psychiatric conditions (17). There is however a need for more longitudinal prospective  
40 data on this interaction in patients with IBD and IBS compared with healthy controls. We have  
41 conducted systematic reviews in both IBS (18) and IBD (19); although there are numerous case  
42 control studies exploring the gut microbiome in these conditions, the median sample size is around  
43  
44 20 per arm and in all cases the sample size was insufficient to deal with the multiple testing issues  
45 that relate to microbiome research in humans. In addition, inter-individual differences of the gut  
46  
47  
48  
49  
50  
51  
52  
53  
54  
55  
56  
57  
58  
59  
60

1  
2  
3 over time are therefore needed to evaluate the interaction between diet, the microbiome, IBS, IBD  
4  
5 and associated mental health issues.  
6  
7  
8  
9

10 The Inflammation, Microbiome, and Alimentation: Gastro-Intestinal and Neuropsychiatric Effects  
11 (IMAGINE) (20) (see Appendix 1) Strategy for Patient Oriented Research (SPOR) Network is  
12  
13 conducting a five-year multicenter prospective observational cohort study, Mind And Gut  
14  
15 Interactions Cohort (MAGIC). It will explore the interaction between the diet, microbiome and the  
16  
17 host associated with IBS and IBD in order to better target treatment of IBD and IBS and the  
18  
19 psychiatric disorders associated and affecting these diseases. The overarching hypothesis of this  
20  
21 study is that IBS and IBD are driven by a perturbation of the gut microbiome and the associated host  
22  
23 immune response. Alterations in the gut microbiome may also drive anxiety and depression  
24  
25 associated with these GI disorders and these psychological factors may in turn influence gut  
26  
27 symptoms and its microbiome. These mechanisms may also have a genetic predisposition.  
28  
29  
30  
31  
32  
33  
34

### 35 **Aims**

36  
37 The main aim of the MAGIC study conducted through the IMAGINE SPOR Network is to create a  
38  
39 large cohort of patients with IBS, IBD and healthy controls and follow these individuals over time,  
40  
41 assessing disease activity, diet, mental health and demographic information using validated  
42  
43 questionnaires and collecting annual stool, urine and blood samples, to correlate GI and  
44  
45 psychological symptoms with an individual's genetic variants, diet, and gut microbiome, as well  
46  
47 host and microbiome metabolic products in stool, urine and serum.  
48  
49  
50  
51  
52  
53  
54  
55  
56  
57  
58  
59  
60

1  
2  
3 ***Primary aims for baseline data***  
4  
5  
6

- 7 1. We will compare the gut microbiome and metabolomic profile between CD, UC, IBS and healthy  
8 controls. The main analyses will be between a specific disorder and healthy controls.  
9  
10 2. We will compare the gut microbiome and metabolomics profile of participants with active versus  
11 quiescent disease within CD, UC and IBS.  
12  
13 3. We will compare the gut microbiome and metabolomic profile of participants with and without  
14 psychiatric co-morbidity for each of CD, UC, IBS and healthy controls.  
15  
16  
17  
18  
19  
20  
21  
22

23 ***Primary aims for longitudinal data***  
24

- 25 1. Microbiome, metabolomic, genetic, inflammatory markers, dietary, disease phenotype, psychiatric  
26 comorbidity and demographic predictors of failure of therapy for each of UC, CD, and IBS.  
27  
28 2. Comparison of microbiome, metabolomic, genetic, dietary and demographic factors in IBD of  
29 participants who remain in clinical remission over 2 years versus those with recurrent active disease  
30 (UC and CD analyzed separately).  
31  
32 3. Comparison of gut microbiome, metabolomic, genetic, dietary and demographic factors in  
33 participants with IBS with mild/inactive disease (based on IBS-Symptom Severity Score (SSS))  
34 compared with those with ongoing active disease. IBS will be evaluated overall and also within  
35 subgroups independently.  
36  
37  
38  
39  
40  
41  
42  
43  
44  
45  
46  
47

48 ***Secondary aims for baseline data***  
49

- 50 1. To compare dietary patterns between patients with CD, UC, IBS and healthy controls.  
51  
52 2. To compare genetic risk factors between CD, UC, IBS and healthy controls.  
53  
54 3. To compare gut microbiome, metabolomic, genetic, dietary and demographic factors in  
55  
56  
57  
58  
59  
60

1  
2  
3 participants with IBD with quiescent inflammatory disease with and without concomitant IBS  
4  
5 (defined by fecal calprotectin <50 mcg/g and subthreshold IBD symptom activity score but who  
6  
7 have active IBS symptoms on IBS-SSS).  
8  
9

10 4. To compare the prevalence of mood and anxiety disorders in participants with each disorder  
11  
12 against rates in healthy controls.  
13

14 5. To compare the dietary, gut microbiome and metabolomics profile between participants with or  
15  
16 without anxiety (CD, UC, IBS, healthy controls analyzed separately).  
17  
18

19 6. To compare the dietary, gut microbiome and metabolomics profiles between participants with and  
20  
21 without depression (CD, UC, IBS, healthy controls analyzed separately).  
22  
23

24 7. To determine whether high rates of early adverse experiences are associated with history of more  
25  
26 severe disease or treatment resistance in participants with CD, UC or IBS.  
27  
28

29 8. To examine the association between symptom severity and multiple domains of function in  
30  
31 participants with CD, UC or IBS.  
32

33 9. To develop models describing how factors such as microbiome, metabolome, diet, genes and  
34  
35 psychiatric symptoms interact in CD, UC, and IBS.  
36  
37

#### 38 39 40 ***Secondary aims for longitudinal data***

41 1. To compare health care resource use between CD, UC, IBS and healthy controls.  
42  
43

44 2. To compare work productivity between CD, UC, IBS and healthy controls.  
45  
46

47 3. To compare baseline dietary and gut microbiome and urinary metabolome profiles and  
48  
49 inflammatory markers in participants that develop anxiety during follow up versus those who did not  
50  
51 have anxiety at any time (CD, UC, IBS and healthy controls analyzed separately).  
52  
53

54 4. To compare baseline dietary and gut microbiome and urinary metabolome profiles in participants  
55  
56  
57  
58  
59  
60



1  
2  
3 that develop depression during follow up versus those that did not have depression at any time (CD,  
4 UC, IBS and healthy controls analyzed separately and if appropriate combined).  
5  
6

7  
8 7. To compare gut microbiome, urinary metabolome, genetic, dietary and demographic factors in  
9  
10 IBS at baseline in those that change their IBS subtype during follow up and those that continue with  
11  
12 the same IBS subgroup.  
13

14  
15 8. To compare which dietary, mental health, gut microbiome and metabolomics profiles precede a  
16  
17 clinical relapse in patients with IBD and how these parameters are different in patients with active  
18  
19 disease versus those who remain in clinical remission.  
20  
21  
22  
23

## 24 **METHODS**

### 25 **Design**

26  
27  
28 The IMAGINE MAGIC study is a prospective observational cohort study that is recruiting 2000  
29  
30 participants with each of CD, UC, and IBS and also 2000 healthy participants in 15 centers across  
31  
32 Canada. Assessment includes psychological status, dietary intake, gut microbiome, urinary  
33  
34 metabolomic profile, inflammatory markers, genotype, health-related quality of life, and health care  
35  
36 resource use and associated costs. The cohort and healthy controls will be followed annually for up  
37  
38 to 4 years after the baseline study enrollment.  
39  
40  
41  
42  
43

44  
45 At each visit, the participant provides blood, urine, and stool samples as well as complete  
46  
47 questionnaires assessing disease activity, quality of life, physical pain, lifestyle factors,  
48  
49 psychological status, and diet. Table 1 summarizes participant information collected at each visit.  
50  
51  
52  
53  
54  
55  
56  
57  
58  
59  
60

## Participants

A total of 8000 participants will be recruited, 2000 for each for healthy volunteers, IBS, UC and CD.

Inclusion and exclusion criteria are outlined in Table 1.

Healthy participants over the age of 4 will be recruited from the relatives, spouses and friends of IBS and IBD cases taking part and also through advertisement for healthy volunteers. IBS and IBD patients will primarily be recruited from gastroenterology clinics at participating centres.

IBS: Persons who meet Rome IV criteria and are 13 years of age or older are enrolled (Table 1).

Persons with IBS are categorized into diarrhea-predominant IBS (IBS-D), constipation-predominant IBS (IBS-C), IBS with mixed bowel habits (IBS-M), or unclassified with IBS (IBS-U) (21). Patients with IBS that also have celiac disease will be eligible provided they continue to have symptoms after six months of a gluten free diet and their tissue transglutaminase antibody has returned to normal.

IBD: Persons with either CD or UC over the age of 4 years are enrolled regardless of whether the disease is active or in remission (Table 1). Persons with unclassified IBD (IBD-U) are included. The Montreal Classification is used for adult CD and UC patients (22), and the Paris classification (23) for pediatric IBD. The research coordinator conducts a chart review to confirm the date of diagnosis and maximal phenotype at time of enrolment using the Montreal Classification.

## Data Collection

All participants attend a baseline, 12, 24, 36 and 48-month visit. Sources of information for each patient are blood, urine and stool samples, questionnaires, and chart review (Table 2).

1  
2  
3  
4  
5 Participants complete a questionnaire to obtain age, sex, gender identity, education level attained,  
6 ethnic heritage, smoking/alcohol/drug history, comorbidities, medication and therapies, menstrual  
7 status at baseline. The study research coordinator records height, weight, BMI and disease-related  
8 information (24). Participants answer a series of validated questionnaires to assess disease activity,  
9  
10 quality of life, physical pain, lifestyle factors, psychological status, and diet at each study visit.  
11  
12 (Table 3). Questionnaires measuring anxiety, depression, generalized anxiety disorder, sleep  
13  
14 disturbance, generalized anxiety disorder, perceived stress, adverse childhood experiences,  
15  
16 resiliency, and pain catastrophizing in both adults and children are outlined in Table 3.  
17  
18  
19  
20  
21  
22  
23  
24  
25

26 Healthcare resource use data and associated costs regarding physician visits, clinical procedures,  
27 imaging procedures, hospitalizations, emergency room visits, and medication use are collected by  
28 linking the participants to provincial administrative data from the Canadian Gastro-Intestinal  
29  
30 Epidemiology Consortium (CanGIEC) (<https://cangiec.ca>).  
31  
32  
33  
34  
35  
36

### 37 **Biosamples**

38  
39 A stool sample is collected for fecal microbiome, inflammatory markers and short chain fatty acids.  
40  
41 A urine sample is collected for metabolomics, and blood samples are taken for DNA isolation as  
42  
43 well as for serum for inflammatory markers (ie cytokines, chemokines, hsCRP, lipopolysaccharide)  
44  
45 and metabolomic profile (e.g. tryptophan metabolites, growth factors such as brain-derived  
46  
47 neurotrophic factor, neurotransmitters such as GABA and serotonin, and stress hormones such as  
48  
49 cortisol) at each study visit. All biosamples are shipped to Population Health Research Institute  
50  
51 (PHRI) for storing at -80 degrees Celsius.  
52  
53  
54  
55  
56  
57  
58  
59  
60

## Data Management

Questionnaires are completed electronically using tablets during the clinic with the option to complete the any questionnaires remaining after clinic visit at home on a computer using an e-mail link. The user questionnaires are available in the REDCap platform stored at a central database collection center, PHRI, at McMaster University. Study staff will review surveys within two weeks of receipt and highlight any missing answers that suggests a problem in completing the survey. These issues will be discussed with the PI, site lead and study team. The staff contact participants up to three times by phone e-mail or in person at a regular study visit to remind them to complete questionnaires and to acquire answers to missing items.

## Patient and Public Involvement

The research proposed in IMAGINE was informed by patients. Patient perspectives were sought in identifying priorities for strategic research funding opportunities. Diet, researching the gut microbiome, and mental health were initially identified as key priorities through this process. Through the Crohn's and Colitis Canada (CCC) "Gutsy Learning Series" these priorities were further defined with 289 lay participants in-person and on-line with IBD who gave feedback on what they felt were the most important research topics, identifying fecal transplants, diet and mental health as key priorities. Furthermore, through a workshop organized by the Canadian Digestive Health Foundation (CDHF) prior to this IMAGINE SPOR application, a key message was that IBS patients are concerned about using current pharmacological therapies to relieve their symptoms and prefer approaches that correct the imbalances they perceive to be the root cause of their disorder rather than taking drugs. Patients with IBS are concerned with the long-term use of powerful and sometimes expensive agents and would like more exploration of the factors that are driving the disease. One of the major areas this

1  
2  
3 patient group wanted more research on was the role of diet and also the role that gut bacteria (and  
4 probiotics) play in driving IBS. There is remarkable congruence in the research priorities of the IBD  
5 and IBS patient communities. The IMAGINE SPOR proposal was informed by these priorities and  
6 seeks to address them by exploring the diet-gut microbiome-relationship and how this influences GI  
7 and mental symptoms of IBS and IBD.  
8  
9  
10  
11  
12  
13  
14  
15  
16

17 IMAGINE Patient Research Partners were involved in the development of the MAGIC demographic  
18 questionnaire. They also served to pilot test the online questionnaires and provide feedback on user  
19 experience and feasibility.  
20  
21  
22  
23  
24  
25

26 IMAGINE Patient Partners have been directly involved with study design and recruitment of subjects  
27 in IMAGINE and will support capacity development for patient engagement more broadly. In person  
28 interviews are being conducted by our Patient Partners to identify strategies to improve recruitment  
29 and retention rates. Also, this network of patient-engaged researchers is communicating knowledge  
30 derived from the study to healthcare professionals, policy makers, and other patients.  
31  
32  
33  
34  
35  
36  
37  
38  
39

40 A key component of the IMAGINE research program is developing capacity for patient engagement,  
41 patient preferences for informing treatment choices and working with our Patient Partners to improve  
42 our recruitment rates and long-term retention of IMAGINE participants. We have a unique opportunity  
43 to integrate patient engagement as recommended by SPOR by leveraging our innovative Patient and  
44 Community Engagement Research (PaCER) program based at the University of Calgary (25, 26).  
45 PaCER is designed to promote new roles for patients and family members in health care and health  
46 culture through engagement in research. PaCER provides opportunities for patients to be involved in  
47  
48  
49  
50  
51  
52  
53  
54  
55  
56  
57  
58  
59  
60

1  
2  
3 the development and conduct of research designed to affect the lives of patients living with IBD and  
4  
5 IBS. Involving patients and families in research is an opportunity to increase the capacity to anticipate  
6  
7 problems, manage their condition as a partner in their health care team, and to support other patients  
8  
9 and families.  
10  
11  
12  
13

## 14 **DATA MONITORING AND ETHICS**

15  
16  
17 This is an observational study with no intervention mandated by the protocol and so there is no  
18  
19 external data safety and monitoring board. Research ethics approval has been obtained for all 15  
20  
21 sites involved in the study. The protocol was approved on May 31, 2017 with an approval number  
22  
23 2017-3000-GRA with the last amendment to date being on June 25, 2019. The study was  
24  
25 prospectively registered on April 27<sup>th</sup> 2017 (ClinicalTrials.gov Identifier: NCT03131414) and this  
26  
27 was last updated on March 7<sup>th</sup> 2019. Recruitment commenced in October 2017.  
28  
29  
30  
31  
32

## 33 **SAMPLE SIZE AND ANALYSES**

### 34 **Sample size**

35  
36  
37 UC, CD and IBS cases will be analyzed. A sample size of 2000 cases in each disease group and  
38  
39 2000 healthy controls will have 90% power to detect a probability of 0.547 that an observed  
40  
41 abundance in the disease group is more than the observed abundance in the control group using a  
42  
43 Wilcoxon (Mann-Whitney) rank-sum test with a 0.001 two-sided significance level (to adjust for  
44  
45 multiple testing). This sample size also assumes 20% data dropout. The probability of 0.547 was  
46  
47 derived from 75 IBD cases that we have obtained from pilot studies (27).  
48  
49  
50  
51  
52  
53  
54  
55  
56  
57  
58  
59  
60

## Analyses

Primary and secondary aims will be evaluated through multivariate logistic regression with further details regarding how diet, microbiome, metabolomics and genetics will be analysed below.

### *Diet Analyses*

We will use principal component analysis to derive dietary patterns from self-reported semi-quantitative food-frequency questionnaires, and understand the differences in dietary patterns across participants with UC, CD, IBS, and healthy controls; and for active versus non-active disease within each disease group, as outlined in the primary and secondary aims. Briefly, the purpose of PCA and/or machine learning is to reduce large and complex high-dimensional data into fewer dimensions — in this case comprehensive FFQ data (containing up to 150 items or more) is reduced to 2 or 3 dietary patterns (i.e., foods commonly consumed together) that explain the greatest amount of dietary variability within the reported eating habits of the cohort (28). The number of dietary patterns to be retained for subsequent analysis will be based on visual inspection of Scree plots in conjunction with eigenvalues, and principal component interpretability (29). To account for differences in total energy intake between participants, dietary pattern scores will be adjusted to the mean total population caloric intake using the residual method (28). Associations between a participant's adherence to a specific PCA-derived dietary pattern (e.g., Western or plant-based) and UC, CD, IBS and its disease activity will be quantified using logistic regression (case vs control) with appropriate adjustment for covariates (e.g., BMI, age, sex, etc.). For machine learning, dietary patterns will be derived using unsupervised methods that require little to no input or direction by the researcher. The use of both PCA and unsupervised machine learning methods will allow for validation of the derived diet patterns. Our experience suggests that the PCA and machine learning

1  
2  
3 derided patterns will be largely similar (30).  
4  
5  
6  
7

8 In an exploratory analysis, of particular interest for the IBS group, we will collect data using a  
9  
10 supplementary fermentable oligo-di-monosaccharides and polyols (FODMAP) Questionnaire to  
11  
12 capture foods rich in: a) oligosaccharides, including fructans and galacto-oligosaccharides; b)  
13  
14 disaccharides, including lactose; c) monosaccharides, including fructose; d) polyols. These data will  
15  
16 be used to better understand “trigger foods” or dietary components that are likely to produce  
17  
18 symptoms in participants with IBS.  
19  
20  
21  
22  
23

### 24 ***Microbiome Processing and Analyses***

25  
26 All stool samples will be processed in one lab for consistency. Frozen samples sent from each site  
27  
28 will be thawed on ice in an anaerobic environment, mixed thoroughly with a sterile spatula. Two  
29  
30 aliquots of 0.3g will be transferred to DNA extraction buffer for molecular analysis. Three aliquots  
31  
32 of 1.8 mL will be biobanked at -80°C. DNA will be extracted using established methods (31). Total  
33  
34 bacterial load will be measured by quantitative PCR of the 16S rRNA gene. Microbial community  
35  
36 profiling will be carried out by amplification and paired-end Illumina sequencing of the v3-v4 region  
37  
38 of the 16S rRNA gene for bacteria (31, 32) and the Internal Transcribed Region of the ribosomal  
39  
40 genes (ITS) for fungi (33). Microbiome profiles will be processed through in house bioinformatic  
41  
42 pipelines (34) incorporating dada2 (35) to generate amplicon sequence variants (ASVs). As  
43  
44 sequencing and library construction costs decrease, it will be feasible to carry out shotgun  
45  
46 metagenomics on a significant portion of the stool samples. We aim to reduce costs so it is possible  
47  
48 to perform this on all samples but if this is not possible, we will perform shotgun metagenomics on  
49  
50 at least 20% of randomly selected samples from each group. Metagenomic sequencing libraries will  
51  
52  
53  
54  
55  
56  
57  
58  
59  
60



1  
2  
3 be constructed using NEBNext Ultra DNA Library kits with modifications to reduce reaction  
4 volume. Libraries will be sequenced to ~15,000,000 reads per sample (150nt paired-end) on an  
5 Illumina NovaSeq. After filtering and trimming for sequence quality and primer removal, DeconSeq  
6 (36) will be performed on the remaining reads in order to remove reads of human DNA. Genes and  
7 functional predictions and comparisons across sample groups will be computed using HUMAnN2  
8 (37) and MetaPhlAn (38) for functional microbiome analysis.

9  
10  
11  
12  
13  
14  
15  
16  
17  
18  
19 Microbiome analysis will include  $\alpha$ -diversity metrics for each sample (observed species, chao1,  
20 Shannon diversity) and  $\beta$ -diversity measures will be used to compare diversity between samples.  
21 For the latter, centered log-ratio transformation of the read count data will be carried out to account  
22 for the compositional nature of microbiome data (39) and visualized using Aitchison principal-  
23 component analysis (40). Statistical analyses will be carried out in R using PhyloSeq (41), and  
24 ALDEx2 (42) in R. Using generalized linear mixed models (GLMM), we will identify microbial  
25 taxa and/or genes associated with disease phenotypes/progression, response to treatment, genotype,  
26 diet and other measured parameters. The large number of samples will also allow for application of  
27 machine learning methods such random forest and support vector machine methods (43, 44).

### 41 42 ***Metabolomics Processing and Analyses***

43  
44 Urinary metabolomic profiles will be determined and analyzed together with microbial and dietary  
45 profiles to identify relationships and associations with disease status and clinical  
46 phenotypes/response to therapies. Urinary metabolic profiles will be analyzed by  $^1\text{H-NMR}$  on a 4-  
47 channel Varian INOVA 600 MHz NMR spectrometer. Assignment of endogenous urinary  
48 metabolites will be done using Chenomx NMR Suite 8.5 (Chenomx Inc, Edmonton, Canada) and

1  
2  
3 online databases (HMDB) (45). Metabolite concentrations will be  $\log_{10}$  transformed to normalize  
4 data prior to statistical analyses. Metabolome association study analyses will be done using multiple  
5 linear regression models in the R Project for Statistical Computing (R program). Projection-based  
6 principal component analysis (PCA), partial least-squares discriminant analysis (PLS-DA),  
7 orthogonal partial-least squares (OPLS) analysis will be performed using R program.  
8  
9  
10  
11  
12  
13  
14  
15

### 16 *Genetic Analyses*

17  
18 In terms of genetic analyses, genomic DNA samples will be tested using two different approaches:  
19  
20 1) genome-wide genotyping to capture common genetic variation and enable genome-wide  
21 association studies (GWAS) and 2) whole exome sequencing (WES) will primarily be used to  
22 capture rare genetic variation and identify non-synonymous coding variants as potential causal  
23 variants. Both datasets will be used to identify genetic risk variants associated with disease status or  
24 clinical phenotypes/outcomes detailed above (e.g. response to therapy); both as previously described  
25 (46-49). These data will also be used to impute the genetic variation at the highly polymorphic  
26 Human Leukocyte Antigens (HLA) and Killer cell Immunoglobulin-like Receptor (KIR) genes (50,  
27 51), as these are key determinants of the host's immune response and genetic risk factors for many  
28 inflammatory diseases.  
29  
30  
31  
32  
33  
34  
35  
36  
37  
38  
39  
40  
41  
42  
43  
44

45 For the statistical analyses, following rigorous quality control of the genotype/sequence data, whole  
46 genome imputation of the dataset using a relevant public reference panel (e.g. 1000 Genomes,  
47 Haplotype Reference Panel, TOPMed, etc.) (52, 53) will be performed followed by principal  
48 components analysis (PCA). Principal components will be tested for phenotype association (using  
49 logistic regression with study indicator variables included as covariates) and evaluated for their  
50  
51  
52  
53  
54  
55  
56  
57  
58  
59  
60

1  
2  
3 impact on the genome-wide test statistics using  $\lambda$  (the genomic control inflation factor based on the  
4 median  $\chi^2$ ) after genome-wide association of the specified principal component. Association testing  
5  
6 as well as binary and linear genotype– phenotype analyses will be done with PLINK and  
7  
8 multinomial and ordinal regression analyses with a custom program, Trinculo. Survival analysis and  
9  
10 risk prediction will be done with R using the packages “survival” and “Mangrove”, respectively. For  
11  
12 integrated biomarker discovery (54), this genetic data will also be integrated with other biomarker  
13  
14 data generated from the various IMAGINE platforms, in order to select those that estimate a large  
15  
16 association with clinical outcomes (e.g. response to therapy), in order to create the best subset of  
17  
18 predictors. Variable selection will be based on mathematical criteria for model selection, i.e., the  
19  
20 Bayesian Information Criteria (BIC), and expert a priori (e.g., clinical knowledge, preliminary  
21  
22 evidence). The selection of the model will be in the context of logistic regression, using the  
23  
24 candidate biomarkers as covariates and drug response (positive or negative) as the outcome. The  
25  
26 BIC has been proven to lead to less over-fitting of the model to data compared to other less  
27  
28 conservative approaches (55). This will reduce type-I errors and lead to increased robustness of the  
29  
30 results.  
31  
32  
33  
34  
35  
36  
37

### 38 ***Subgroup Analyses***

39  
40  
41 There are a number of subgroup analyses planned. In particular, we will analyze the primary and  
42  
43 secondary outcomes by sex. We will strive to ensure representative enrollment of men and women  
44  
45 with a wide range of life experience and at different life stages. When women are surveyed or  
46  
47 otherwise evaluated, we will take note of past, anticipated and ongoing pregnancies, obtain a  
48  
49 menstrual history, and use instruments that are sensitive to the influence of gender on outcomes.  
50  
51  
52  
53  
54

55 The pediatric population (IBD cases aged 4-18 years of age) is also an important group to study. All  
56  
57  
58  
59  
60

1  
2  
3 the primary and secondary outcomes described above will also be evaluated specifically in the  
4 pediatric population. This includes predictors of success and failure of therapy for IBD. Children  
5 developing IBD are predominantly treated from the time of first presentation at academic centres  
6 rather than in community practice. Hence the pediatric collaborators in this proposal offer access to  
7 the broad spectrum of IBD, including prior to alteration of the microbiome by any therapy. We will  
8 evaluate predictors of success and failure of these therapies for IBD over time in the pediatric  
9 population.  
10  
11  
12  
13  
14  
15  
16  
17  
18  
19  
20

21 We will evaluate subtypes of IBS; constipation predominant, diarrhea predominant and mixed  
22 patterns. We will assess the microbiome, metabolomics, genetic, demographic and dietary predictors  
23 of response to therapies for IBS. Predictors of response to a low FODMAPs diet will help inform a  
24 RCT of low FODMAPs diet in IBS, and in particular we will evaluate whether responders are more  
25 likely to initially be taking a diet that is very rich in FODMAPs and how this response relates to  
26 their microbiome compositional and functional changes, affected by diets. A subgroup analysis will  
27 be performed of those between the ages of 13 to 17 compared to adult patients. We will also  
28 evaluate those with stable celiac disease and compare results to those without this disorder.  
29  
30  
31  
32  
33  
34  
35  
36  
37  
38  
39  
40  
41

## 42 **DISSEMINATION**

43  
44 Our approach to dissemination involves developing evidence-based knowledge translation initiatives  
45 for research that is ready for prime time – for each of category of our three research partners  
46 (patient, clinicians and policymakers). For patients, we plan to create a ‘white label’ version of the  
47 McMaster Optimal Aging Portal (<https://www.mcmasteroptimalaging.org>) that focuses specifically  
48 on supporting self-management and more generally informed decision-making for GI disease. This  
49  
50  
51  
52  
53  
54  
55  
56  
57  
58  
59  
60

1  
2  
3 involves 1) identifying existing Evidence Summaries and preparing new ones to provide patients  
4 with the key messages from scientific research (typically high-quality systematic reviews) that's  
5 ready to be acted on; 2) identifying existing Web Resource Ratings and preparing new ones to help  
6 patients identify the free health resources on the internet that are based on scientific research; 3)  
7 identifying existing Blog Posts and preparing new ones that provide commentaries for patients about  
8 on what the scientific research on a topic actually means and on why good science matters; and 4)  
9 identifying existing patient decision aids to help patients (and clinicians working with patients) to  
10 engage in shared decision-making.  
11  
12  
13  
14  
15  
16  
17  
18  
19  
20  
21  
22  
23

24 We will work with network partners (e.g. CDHF and CCC) to determine the best online platform for  
25 patient-focused products, to develop inclusion criteria, and to ensure that their online resources  
26 focused on GI disease meet the high standard necessary to be captured and ranked highly in the Web  
27 Resource Ratings. We plan to prepare 52 new Evidence Summaries, 24 Blog Posts, and 400 Web  
28 Resources Ratings for the 'white label' portal. We will also be working with network partners to  
29 ensure high rates of use of the white-label, GI disease-focused content site for patients.  
30  
31  
32  
33  
34  
35  
36  
37  
38  
39

40 The patients, family members and caregivers who live with the chronic conditions covered by the  
41 IMAGINE Network will be able to use the portal to find information that aids them in managing  
42 their conditions and making related health decisions. The content produced by the McMaster  
43 Optimal Aging Portal has been shown to be effective in informing health consumers of quality health  
44 information related to aging but not in other domains. We plan to conduct a randomized controlled  
45 trial (which will be detailed in a separate protocol) to assess how the online resources for patients,  
46  
47  
48  
49  
50  
51  
52  
53  
54  
55  
56  
57  
58  
59  
60

1  
2  
3 provided through the white label website, changes patient behaviour in regards to using information  
4 and making evidence-informed health decisions.  
5  
6  
7  
8  
9

10 For clinicians, we will follow an approach that emerged from a comprehensive review of the  
11 literature on scaling up effective clinical interventions (summarized in an evidence brief) (56) and a  
12 stakeholder dialogue involving the key policymakers, stakeholders and researchers focused on  
13 supporting scale up of effective clinical practices in Ontario (summarized in a dialogue summary)  
14 (57): 1) supporting dynamic efforts to identify GI disease-related clinical practices to be optimized  
15 and the causes of underlying problems, using both empirical approaches like systematic reviews and  
16 theoretical approaches like the Behaviour Change Wheel and the Theoretical Domains Framework;  
17 2) using rigorous processes to select and implement approaches to optimizing clinical practices that  
18 address the underlying causes of problems (e.g., audit and feedback, financial incentives; and 3)  
19 monitoring, evaluating and reviewing the approaches selected to optimize clinical practices. We plan  
20 to support two approaches: 1) prioritizing clinical interventions to be scaled up by engaging network  
21 members using an explicit process; and 2) scaling up effective clinical interventions by developing  
22 and executing a scale-up plan, both of which will build on what has been learned from related work  
23 at the McMaster Health Forum, and will rely on the frequent engagement of key members of the  
24 IMAGINE SPOR Network in doing so.  
25  
26  
27  
28  
29  
30  
31  
32  
33  
34  
35  
36  
37  
38  
39  
40  
41  
42  
43  
44  
45  
46

47 For policymakers, we will use our tried and tested approach to supporting evidence-informed  
48 policymaking, which means: 1) preparing an evidence brief on a pressing need for scale-up and the  
49 factors hindering that achievement (e.g., nurses' scope of practice, existing financial incentives, lack  
50 of multidisciplinary teams), options for scaling up, and key implementation considerations (which  
51  
52  
53  
54  
55  
56  
57  
58  
59  
60

1  
2  
3 includes an equity lens brought to bear on particularly vulnerable groups); 2) convening a  
4 stakeholder dialogue that brings together key policymakers, patient and clinical leaders and  
5 researchers who can consider the research evidence alongside the other factors that drive decision-  
6 making; and 3) preparing a dialogue summary, disseminating the evidence brief and dialogue  
7 summary, conducting personalized briefings to senior leaders in the system, and supporting their  
8 efforts to act on what they learned.  
9

10 We will enhance this approach by convening citizen panels to capture the insights and values of a  
11 diverse group of citizens, with different types of lived experience with the issue at hand, in a panel  
12 summary, the key messages of which would be included in the evidence brief informing the  
13 stakeholder dialogue. We plan to address two topics using this approach, one focused on reducing  
14 emergency-department usage in people with IBD, and one focused on framing the work led by  
15 IMAGINE in the context of rapid learning health systems for specific conditions (including those  
16 addressed by the IMAGINE Network). For each topic we will conduct consultations with a steering  
17 committee and key informants to define the terms of reference for evidence briefs, identify  
18 stakeholders and potential dialogue invitees, and review the outputs (briefs, summaries, and  
19 evaluation reports).  
20  
21  
22  
23  
24  
25  
26  
27  
28  
29  
30  
31  
32  
33  
34  
35  
36  
37  
38  
39  
40  
41  
42  
43

## 44 **ARTICLE SUMMARY**

### 45 **Strengths**

46  
47 Studies that have evaluated the microbiome in IBS (18) and IBD (19) have been small and  
48 underpowered. These studies usually did not evaluate disease phenotype in detail and have not  
49 assessed diet (18, 19), which can be an important effect modifier (58). This will be the largest  
50  
51  
52  
53  
54  
55  
56  
57  
58  
59  
60

1  
2  
3 observational study published to date that is sufficiently powered to evaluate the microbiome in IBS  
4 and IBD. All relevant confounding factors and effect modifiers will be captured and followed over  
5  
6 time and longitudinally, which will allow a better understanding of what drives exacerbations of  
7  
8 both IBS and IBD given that these are chronic relapsing and remitting diseases. There is also the  
9  
10 possibility of pooling data with similar cohorts to provide more robust data on microbiome changes  
11  
12 over time in these diseases (59). The other strength of the study is the multidisciplinary team that  
13  
14 makes up the IMAGINE Network. In particular, the collaboration between psychiatry and  
15  
16 gastroenterology allows a careful evaluation of gut brain connections (17) and in particular how the  
17  
18 gut microbiome (60) may impact on anxiety and depression in patients with IBD and IBS. Another  
19  
20 key component of the multidisciplinary team is the level of patient engagement throughout the  
21  
22 proposal. This is a Canadian Institute of Health Research funded grant through the SPOR initiative  
23  
24 mandating that priorities are set by patients and they have input into study design. To date, we have  
25  
26 19 patient partners as part of the IMAGINE Network and many are involved in the MAGIC cohort  
27  
28 study. This strengthens the research, making it more patient focused, and supports knowledge  
29  
30 translation of the findings to patients.  
31  
32  
33  
34  
35  
36  
37  
38  
39

### 40 **Limitations**

41  
42 This study is observational so any associations found may not relate to the causes of IBS and IBD.  
43  
44 We will rigorously control for confounding factors and but cannot control for unknown confounders  
45  
46 and so cannot draw causal inferences from the data. The MAGIC study will therefore be hypothesis  
47  
48 generating and any data relating to the microbiome or diet is likely to need confirmation in  
49  
50 randomized controlled trials (RCTs). The IMAGINE Network is committed to develop RCTs to  
51  
52 further investigate any promising findings from the MAGIC cohort study. This is the largest study  
53  
54  
55  
56  
57  
58  
59



1  
2  
3 evaluating IBS and IBD, but the data that will be collected is enormous and so any results related to  
4 the secondary outcomes of the study need to be interpreted with caution. The adjustment for  
5 multiple testing is for the primary outcomes only and given the number of other outcomes that can  
6 be evaluated with the data that is generated, it is important to realize that any positive results from  
7 the secondary outcomes could be a chance finding related to multiple testing. We will highlight this  
8 when reporting the data of more exploratory outcomes being studied. Despite these caveats, the  
9 MAGIC study will provide valuable insight into the etiology of IBS and IBD as well as associated  
10 psychiatric disorders. Data from this study will also provide strategies for personalized medicine  
11 approaches to manage these diseases more effectively.  
12  
13  
14  
15  
16  
17  
18  
19  
20  
21  
22  
23  
24  
25

## 26 **ACKNOWLEDGEMENTS**

27  
28 We are grateful to Glenda MacQueen for all the support she gave to the IMAGINE Network and the  
29 MAGIC study. Her advice was invaluable throughout this project and she will be missed by all of  
30 us. We are grateful to all our patient partners and everyone within the IMAGINE Network.  
31  
32  
33  
34  
35  
36  
37

## 38 **FUNDING SOURCES**

39  
40 The IMAGINE Network is supported by a grant from the Canadian Institute of Health Research  
41 (Funding Reference Number: RN279389 – 35803) with funding from several partners. Funding was  
42 matched by McMaster University, University of Calgary, University of Alberta, Queen's University,  
43 Dalhousie University, Montreal Heart Institute Research Centre, Takeda Pharmaceutical Company,  
44 Allergan Incorporated, Alberta Innovates, Research Manitoba, Crohn's and Colitis Canada.  
45  
46  
47  
48  
49  
50  
51  
52  
53  
54  
55  
56  
57  
58  
59  
60

## DISCLOSURES

Dr. Moayyedi holds the Audrey Campbell Chair in Ulcerative Colitis Research. Drs. Moayyedi, Bercik and Aida Fernandes have no conflicts of interest.

Dr. Bernstein is supported in part by the Bingham Chair in Gastroenterology. He is on Advisory Boards for AbbVie Canada, Janssen Canada, Takeda Canada, Pfizer Canada. He is a Consultant for Mylan Pharmaceuticals. He is receiving educational grants from AbbVie Canada, Pfizer Canada, Shire Canada, Takeda Canada, Janssen Canada. Speaker's panel for AbbVie Canada, Janssen Canada, Takeda Canada, and Medtronic Canada. Received research funding from AbbVie Canada.

Dr. Rioux receives research funding from Pfizer Inc.

Dr. Dieleman is on the Advisory Boards for Janssen Canada, AbbVie Canada, Pfizer Canada and Takeda Canada.

Dr. Marshall holds a Canada Research Chair (2008-18) and the Arthur J.E. Child Chair and receives travel reimbursement through Illumina for meetings of the Global Economics and Evaluation of Clinical Genomics Sequencing Working Group.

Dr. Vanner was supported by an Educational grant from Allergan.

Sandra Zelinsky is a patient research partner and received a grant from Takeda Canada.

## Data Statement

Technical appendix, statistical code, and dataset will be available from a repository (e.g. Dryad data repository) once follow up is complete and main analyses have been published.

## Author Contributions

PM, GM, CNB, SV, PB, KLM, MGS, JDR, LAD, EFV, RDS, AO, LT, JL, JC, DM, SZ and AF have contributed to the conception and design of the protocol and obtained funding. PM, MGS, JDR, KLM and RDS provided statistical support. JDR led the genetic, MGS the microbiome, KLM the metabolomic, GM the psychiatric, CNB the inflammatory bowel disease, PB and SV the irritable bowel syndrome, LAD, EFV and RDS the diet, AO the pediatric, JL the knowledge translation, DM and SV the patient engagement and JC the data management portions of the protocol. PM and AF constructed the first draft of the article which was significantly revised by all other authors. CNB, SV, PB, KLM, MGS, JDR, LAD, EFV, RDS, AO, LT, JL, JC, DM and SZ have provided informatics support, given critical revisions to the manuscript and approved the final version of the manuscript submitted for publication. PM acts as guarantor for the article.

## Author contact Information

| Author                                 | Contact Information                                                                                       |
|----------------------------------------|-----------------------------------------------------------------------------------------------------------|
| Corresponding Author:<br>Paul Moayyedi | 1280 Main St. W. HSC 3V3<br>Hamilton, ON Canada, L8S 4K1<br>(905) 521 2100 x.76764<br>moayyep@mcmaster.ca |
| Glenda MacQueen                        | Post-humous                                                                                               |
| Charles N Bernstein                    | Charles.Bernstein@umanitoba.ca                                                                            |
| Stephen Vanner                         | vanners@hdh.kari.net                                                                                      |
| Premysl Bercik                         | bercikip@mcmaster.ca                                                                                      |
| Karen L Madsen                         | karen.madsen@ualberta.ca                                                                                  |
| Michael G Surette                      | surette@mcmaster.ca                                                                                       |
| John D Rioux                           | john.rioux@inflammgen.org                                                                                 |
| Levinus A. Dieleman                    | l.dieleman@ualberta.ca                                                                                    |
| Elena F Verdu                          | verdue@mcmaster.ca                                                                                        |
| Russell J de Souza                     | rdesouz@mcmaster.ca                                                                                       |
| Anthony Otley                          | anthony.otley@dal.ca                                                                                      |
| Laura Targownik                        | Laura.Targownik@sinaihealth.ca                                                                            |
| John Lavis                             | lavisj@mcmaster.ca                                                                                        |
| Jennifer Cunningham                    | jennifer.cunningham@phri.ca                                                                               |
| Deborah Marshall                       | damarsha@ucalgary.ca                                                                                      |
| Sandra Zelinsky                        | sandraz.per@gmail.com                                                                                     |
| Aida Fernandes                         | fernaa19@mcmaster.ca                                                                                      |

## Competing Interests

There are no competing interests for any author.

**Word Count: 5,630**

## References

1. Thompson WG, Irvine EJ, Pare P, Ferrazzi S, Rance L. Functional Gastrointestinal Disease in Canada. *Dig Dis Sci* 2002; 47: 225-35.
2. Sperber AD, Bangdiwala SI, Drossman DA, Ghoshal UC, Simren M, Tack J, Whitehead WE, Dumitrascu DL, Fang X, Fukudo S, Kellow J, Okeke E, Quigley EM, Schmulson M, Whorwell P, Archampong T, Adibi P, Andresen V, Benninga MA, Bonaz B, Bor S, Fernandez LB, Choi SC, Corazziari ES, Francisconi C, Hani A, Lazebnik L, Lee YY, Mulak A, Rahman MM, Santos J, Setshedi M, Syam AF, Vanner S, Wong RK, Lopez-Colombo A, Costa V, Dickman R, Kanazawa M, Keshteli AH, Khatun R, Maleki I, Poitras P, Pratap N, Stefanyuk O, Thomson S, Zeevenhooven J, Palsson OS. Worldwide Prevalence and Burden of Functional Gastrointestinal Disorders, Results of Rome Foundation Global Study. *Gastroenterology*. 2020 Apr 12. pii: S0016-5085(20)30487-X. doi: 10.1053/j.gastro.2020.04.014. [Epub ahead of print]
3. Ng SC, Shi HY, Hamidi N et al. Worldwide incidence and prevalence of inflammatory bowel disease in the 21st century: a systematic review of population-based studies. *Lancet* 2017; 390: 2769-78.
4. Brandt LJ, Chey WD, Foxx-Orenstein AE, Quigley EMM, Schiller LR, Schoenfeld PS, Spiegel BM, Talley NJ, Moayyedi P. An evidence-based position statement on the

- 1  
2  
3 management of irritable bowel syndrome. *American Journal of Gastroenterology* 2009; 104  
4  
5 (suppl 1): S1-S36.  
6  
7
- 8 5. Talley NJ, Abreu MT, Achkar JP, Bernstein CN, Dubinsky MC, Hanauer SB, Kane SV,  
9 Sandborn WJ, Ullman TA, Moayyedi P. An evidence-based systematic review on medical  
10 therapies in inflammatory bowel disease. *Am J Gastroenterol* 2011; 106 suppl 1: S2-S25.  
11  
12
  - 13 6. Gralnek IM, Hays RD, Kilbourne A, Naliboff B, Mayer EA. The Impact of Irritable Bowel  
14 Syndrome on Health-Related Quality of Life. *Gastroenterology* 2000; 119: 654-60.  
15  
16
  - 17 7. Casellas F, Lopez-Vivancos J, Badia X et al. Influence of inflammatory bowel disease on  
18 different dimensions of quality of life. *Eur J Gastroenterol Hepatol* 2001;13:567–72.  
19  
20
  - 21 8. Bernstein CN, Loftus EV, Ng SC, Lakatos PL, Mowm B. Hospitalisations and surgery in  
22 Crohn's disease. *Gut* 2012; 61: 622-9.  
23  
24
  - 25 9. Peery AF, Crockett SD, Barritt AS, Dellon ES, Eluri S, Gangarosa LM, Jensen ET, Lund JL,  
26 Pasricha S, Runge T, Schmidt M, Shaheen NJ, Sandler RS. Burden of Gastrointestinal,  
27 Liver, and Pancreatic Diseases in the United States *Gastroenterology* 2015; 149:1731–1741.  
28  
29
  - 30 10. Lee C, Doo E, Choi JM, et al. The Increased Level of Depression and Anxiety in Irritable  
31 Bowel Syndrome Patients Compared with Healthy Controls: Systematic Review and Meta-  
32 analysis. *J Neurogastroenterol Motil.* 2017;23(3):349–362. doi:10.5056/jnm16220  
33  
34
  - 35 11. Mikočka-Walus A, Knowles SR, Keefer L, Graff L. Controversies Revisited: A Systematic  
36 Review of the Comorbidity of Depression and Anxiety with Inflammatory Bowel  
37 Diseases, *Inflammatory Bowel Diseases*, Volume 22, Issue 3, 1 March 2016; 752–762.  
38  
39
  - 40 12. Jones R, Latinovic R, Charlton J, Gulliford M. Physical and psychological co-morbidity in  
41 irritable bowel syndrome: a matched cohort study using the General Practice Research  
42 Database. *Aliment Pharmacol Therap* 2006; 24: 879-86.  
43  
44  
45  
46  
47  
48  
49  
50  
51  
52  
53  
54  
55  
56  
57  
58  
59  
60

- 1  
2  
3 13. Roy-Byrne PP, Davidson KW, Kessler RC, Asmundson GJ, Goodwin RD et al. Anxiety  
4  
5 disorders and comorbid medical illness. *Gen Hosp Psych* 2008; 30: 208-25.  
6  
7
- 8 14. Ford AC, Moayyedi P, Lacy BE, Lembo AJ, Saito YA, Schiller LR, Soffer EE, Spiegel  
9  
10 BMR, Quigley EMM. American College of Gastroenterology Monograph on the  
11  
12 management of irritable bowel syndrome and chronic idiopathic constipation. *American*  
13  
14 *Journal of Gastroenterology* 2014; 109: S1-S26.  
15  
16
- 17 15. Moayyedi P, Simren M, Bercik P. Evidence-based and mechanistic insights into exclusion  
18  
19 diets for IBS. *Nature Reviews Gastroenterology & Hepatology* 2020 epub  
20  
21 DOI: 10.1038/s41575-020-0270-3.  
22  
23
- 24 16. Moayyedi P. Update on fecal microbiota transplantation in patients with inflammatory  
25  
26 bowel disease. *Gastroenterology and Hepatology* 2018; 14: 319-22.  
27  
28
- 29 17. MacQueen G, Surette M, Moayyedi P. The gut microbiome and psychiatric illness. *Journal*  
30  
31 *of Psychiatry and Neuroscience* 2017; 42: 75-7.  
32
- 33 18. Pittayanon R, Lau JT, Yuan Y, Leontiadis GI, Tse F, Surette M, Moayyedi P. Gut  
34  
35 microbiota in patients with irritable bowel syndrome – a systematic review.  
36  
37 *Gastroenterology* 2019; 157: 97-108.  
38  
39
- 40 19. Pittayanon R, Lau JT, Yuan Y, Leontiadis GI, Tse F, Surette M, Moayyedi P. Gut  
41  
42 microbiota in patients with inflammatory bowel disease – a systematic review.  
43  
44 *Gastroenterology* 2020; 158: 930-946 doi:10.1053/j.gastro.2019.11.294  
45  
46
- 47 20. [www.imaginespor.com](http://www.imaginespor.com)  
48
- 49 21. Palsson OS, Whitehead WE, van Tilburg MAL, Chang L, Chey W, et al. Development and  
50  
51 Validation of the Rome IV Diagnostic Questionnaire for Adults. *Gastroenterology* 2016;  
52  
53 150: 1481-1491.  
54  
55  
56  
57  
58  
59  
60

- 1  
2  
3 22. Satsangi J, Silverberg MS, Vermeire S, Colombel J-F. The Montreal classification of  
4  
5 inflammatory bowel disease: controversies, consensus, and implications. *Gut* 2006; 55: 749-  
6  
7 53.  
8  
9
- 10 23. Levine A, Griffiths AM, Markowitz J, Wilson D, Turner D, et al. Pediatric Modification of  
11  
12 the Montreal Classification for Inflammatory Bowel Disease - the Paris Classification.  
13  
14 *Inflamm Bowel Dis* 2011; 17: 1314-21.  
15  
16
- 17 24. Ruemmele FM, Hyams JS, Otley A, Griffiths A, Kolho KL, et al. Outcome measures for  
18  
19 clinical trials in paediatric IBD: an evidence-based, expert-driven practical statement paper  
20  
21 of the paediatric ECCO committee. *Gut* 2015; 64: 438-46.  
22  
23
- 24 25. Shklarov S, Marshall DA, Wasylak T, Marlett NJ. "Part of the Team": Mapping the outcomes  
25  
26 of training patients for new roles in health research and planning. *Health Expectations*, Dec  
27  
28 2017;20:1428-1436  
29
- 30 26. Marlett N, Shklarov S, Marshall DA, Santana MJ, Wasylak T. Building New Relationships in  
31  
32 Research: A Model of Patient Engagement Research. *Qual Life Res* 2015 May;24(5):1057-67.  
33  
34
- 35 27. Moayyedi P, Surette MG, Kim PT, Libertucci J, Wolfe M, Onischi C, Armstrong D,  
36  
37 Marshall JK, Kassam Z, Reinisch W, Lee CH. Fecal Microbiota Transplantation Induces  
38  
39 Remission in Patients With Active Ulcerative Colitis in a Randomized Controlled  
40  
41 Trial. *Gastroenterology* 2015; 149: 102-9.  
42  
43
- 44 28. Hu FB. Dietary pattern analysis: a new direction in nutritional epidemiology. *Curr Opin*  
45  
46 *Lipidol* 2002; 13: 3-9.  
47  
48
- 49 29. Hu FB, Rimm EB, Stampfer MJ, Ascherio A, Spiegelman D, Willet WC. Prospective study  
50  
51 of major dietary patterns and risk of coronary heart disease in men. *Am J Clin Nutr* 2000; 72:  
52  
53 912-2.  
54  
55  
56  
57  
58  
59  
60

- 1  
2  
3 30. Northstone K, Ness AR, Emmett PM, Rogers IS. Adjusting for energy intake in dietary  
4 pattern investigations using principal components analysis. *Eur J Clin Nutr* 2006; 62: 931-8.  
5  
6 113.  
7  
8  
9  
10 31. Lau JT, Whelan FJ, Herath I, Lee CH, Collins SM, Bercik P, Surette MG. Capturing the  
11 diversity of the human gut microbiota through culture-enriched molecular profiling. *Genome*  
12 *Med.* 2016 Jul 1;8(1):72.  
13  
14  
15 32. Woo TE<sup>1,2</sup>, Lim R<sup>2</sup>, Heirali AA<sup>3</sup>, Acosta N<sup>3</sup>, Rabin HR<sup>2,3</sup>, Mody CH, Somayaji R, Surette  
16 MG, Sibley CD, Storey DG, Parkins MD. A longitudinal characterization of the Non-Cystic  
17 Fibrosis Bronchiectasis airway microbiome. *Sci Rep.* 2019 May 3;9(1):6871. doi:  
18 10.1038/s41598-019-42862-y.  
19  
20  
21 33. Xu J. Fungal DNA barcoding. *Genome.* 2016 Nov;59(11):913-932. Epub 2016 Aug 30.  
22  
23  
24 34. Whelan FJ<sup>1</sup>, Surette MG<sup>2,3</sup>. A comprehensive evaluation of the sl1p pipeline for 16S rRNA  
25 gene sequencing analysis. *Microbiome.* 2017 Aug 14;5(1): 100.  
26  
27  
28 35. Callahan BJ, McMurdie PJ, Rosen MJ, Han AW, Johnson AJ, Holmes SP. DADA2: High-  
29 resolution sample inference from Illumina amplicon data. *Nat Methods.* 2016 Jul;13(7):581-  
30 3. doi: 10.1038/nmeth.3869. Epub 2016 May 23.  
31  
32  
33 36. Schmieder R, Edwards R. Fast identification and removal of sequence contamination from  
34 genomic and metagenomic datasets. *PLoS One.* 2011 Mar 9;6(3):e17288. doi:  
35 10.1371/journal.pone.0017288.  
36  
37  
38 37. Franzosa EA, McIver LJ, Rahnnavard G, Thompson LR, Schirmer M, Weingart G, Lipson  
39 KS, Knight R, Caporaso JG, Segata N<sup>6</sup>, Huttenhower C. Species-level functional profiling of  
40 metagenomes and metatranscriptomes. *Nat Methods.* 2018 Nov;15(11):962-968. doi:  
41 10.1038/s41592-018-0176-y. Epub 2018 Oct 30.  
42  
43  
44  
45  
46  
47  
48  
49  
50  
51  
52  
53  
54  
55  
56  
57  
58  
59  
60



- 1  
2  
3 38. Segata N, Waldron L, Ballarini A, Narasimhan V, Jousson O, Huttenhower C. Metagenomic  
4 microbial community profiling using unique clade-specific marker genes. *Nat Methods* 2012;  
5 9: 811-4. doi: 10.1038/nmeth.2066.  
6  
7  
8  
9  
10 39. Gloor GB, Macklaim JM, Pawlowsky-Glahn V, Egozcue JJ. Microbiome Datasets Are  
11 Compositional: And This Is Not Optional. *Front Microbiol.* 2017; 8: 2224.  
12 doi:10.3389/fmicb.2017.02224.  
13  
14  
15  
16 40. Martino C, Morton JT, Marotz CA, et al. A Novel Sparse Compositional Technique Reveals  
17 Microbial Perturbations. *mSystems.* 2019; 4: e00016-19. doi:10.1128/mSystems.00016-19  
18  
19  
20  
21  
22  
23 41. McMurdie PJ, Holmes S. phyloseq: an R package for reproducible interactive analysis and  
24 graphics of microbiome census data. *PLoS One.* 2013; 8: e61217. doi:  
25 10.1371/journal.pone.0061217.  
26  
27  
28  
29  
30 42. Fernandes AD, Reid JN, Macklaim JM, McMurrough TA, Edgell DR, Gloor GB. Unifying  
31 the analysis of high-throughput sequencing datasets: characterizing RNA-seq, 16S rRNA  
32 gene sequencing and selective growth experiments by compositional data  
33 analysis. *Microbiome.* 2014; 2: 15. doi:10.1186/2049-2618-2-15.  
34  
35  
36  
37  
38  
39 43. Qu K, Guo F, Liu X, Lin Y, Zou Q. Application of Machine Learning in Microbiology. *Front*  
40 *Microbiol* 2019; 10: 827. doi: 10.3389/fmicb.2019.00827. eCollection 2019.  
41  
42  
43  
44 44. Camacho DM, Collins KM, Powers RK, Costello JC, Collins JJ. Next-Generation Machine  
45 Learning for Biological Networks. *Cell* 2018;173: 1581-1592. doi:  
46 10.1016/j.cell.2018.05.015.  
47  
48  
49  
50 45. Wishart DS, Tzur D, Knox C, Eisner R, Guo AC, et al. HMDB: the Human Metabolome  
51 Database. *Nucleic Acids Res.* 2007 Jan; 35(Database issue): D521-6.  
52  
53  
54  
55  
56  
57  
58  
59  
60

- 1  
2  
3 46. Anderson CA, Boucher G, Lees CW, Franke A, D'Amato M, et al. Meta-analysis identifies  
4 29 additional ulcerative colitis risk loci, increasing the number of confirmed associations to  
5  
6 47. *Nat Genet.* 2011; 43: 246-52. doi: 10.1038/ng.764.  
7  
8  
9  
10 47. Rivas MA, Avila BE, Koskela J, Huang H, Stevens C, et al. Insights into the genetic  
11 epidemiology of Crohn's and rare diseases in the Ashkenazi Jewish population. *LoS*  
12 *Genet* 2018; 14: e1007329. doi: 10.1371/journal.pgen.1007329.  
13  
14  
15  
16 48. Huang H, Fang M, Jostins L, Umićević Mirkov M, Boucher G, et al. Fine-mapping  
17 inflammatory bowel disease loci to single-variant resolution. *Nature* 2017; 547: 173-178.  
18  
19 doi: 10.1038/nature22969.  
20  
21  
22  
23 49. Cleyngen I, Boucher G, Jostins L, Schumm LP, Zeissig S, et al. Inherited determinants of  
24 Crohn's disease and ulcerative colitis phenotypes: a genetic association study. *Lancet* 2016;  
25 387: 156-67. doi: 10.1016/S0140-6736(15)00465-1.  
26  
27  
28  
29 50. Goyette P, Boucher G, Mallon D, Ellinghaus E, Jostins L, et al. High-density mapping of the  
30 MHC identifies a shared role for HLA-DRB1\*01:03 in inflammatory bowel diseases and  
31 heterozygous advantage in ulcerative colitis. *Nat Genet* 2015; 47: 172-9. doi:  
32 10.1038/ng.3176.  
33  
34  
35  
36 51. Vukcevic D, Traherne JA, Næss S, Ellinghaus E, Kamatani Y, et al. Imputation of KIR  
37 Types from SNP Variation Data. *Am J Hum Genet.* 2015 Oct 1;97(4):593-607. doi:  
38 10.1016/j.ajhg.2015.09.005.  
39  
40  
41  
42 52. Gourraud PA, Khankhanian P, Cereb N, Yang SY, Feolo M, et al. HLA diversity in the 1000  
43 genomes dataset. *PLoS One.* 2014; 9: e97282. doi: 10.1371/journal.pone.0097282.  
44  
45  
46  
47  
48  
49  
50  
51  
52  
53  
54  
55  
56  
57  
58  
59  
60

- 1  
2  
3 53. Das S, Abecasis GR, Browning BL. Genotype Imputation from Large Reference Panels.  
4  
5 Annu Rev Genomics Hum Genet. 2018; 19: 73-96. doi: 10.1146/annurev-genom-083117-  
6  
7 021602.  
8  
9  
10 54. Ivison S, Des Rosiers C, Lesage S, Rioux JD, Levings MK. Biomarker-guided stratification  
11  
12 of autoimmune patients for biologic therapy. *Curr Opin Immunol*. 2017; 49: 56-63. doi:  
13  
14 10.1016/j.coi.2017.09.006.  
15  
16 55. Gao X, Song P. Composite likelihood Bayesian information criteria for model selection in  
17  
18 high-dimensional data. *Journal of the American Statistical Association*. 2010; 105: 1531–  
19  
20 1540. doi:10.1198/jasa.2010.tm09414.  
21  
22 56. Lavis JN, Wilson MG, Grimshaw JM. Evidence Brief: Optimizing Clinical Practice in  
23  
24 Ontario Based on Data, Evidence and Guidelines. Hamilton, Canada: McMaster Health  
25  
26 Forum, 6 March 2015.  
27  
28 57. Wilson MG, Lavis JN. Dialogue Summary: Optimizing Clinical Practice in Ontario Based on  
29  
30 Data, Evidence and Guidelines. Hamilton, Canada: McMaster Health Forum, 6 March 2015.  
31  
32 58. McIntosh K, Reed DE, Schneider T, Dang F, Keshteli AH, De Palma G, Madsen K, Bercik  
33  
34 P, Vanner S. FODMAPs alter symptoms and the metabolome of patients with IBS: a  
35  
36 randomised controlled trial. *Gut* 2017; 66: 1241-1251.  
37  
38 59. Yilmaz, B., Juillerat, P., Øyås, O. *et al*. Microbial network disturbances in relapsing  
39  
40 refractory Crohn's disease. *Nat Med* 2019; 25: 323–336. [https://doi.org/10.1038/s41591-018-](https://doi.org/10.1038/s41591-018-0308-z)  
41  
42 0308-z  
43  
44 60. Bercik P, Collins SM, Verdu EF. Microbes and the gut-brain axis. *Neurogastroenterol Motil*  
45  
46 2012; 24: 405-13.  
47  
48  
49  
50  
51  
52  
53  
54  
55  
56  
57  
58  
59  
60

Table 1: Eligibility criteria

| Type             | Inclusion Criteria                                                                                                                                                                                                                                                                                                                                                                                                                                                                                                                                                                                                                                                             | Exclusion Criteria                                                                                                                                                                                                                                                                                                                                                                                                                                                                                                                                                                                                                                               |
|------------------|--------------------------------------------------------------------------------------------------------------------------------------------------------------------------------------------------------------------------------------------------------------------------------------------------------------------------------------------------------------------------------------------------------------------------------------------------------------------------------------------------------------------------------------------------------------------------------------------------------------------------------------------------------------------------------|------------------------------------------------------------------------------------------------------------------------------------------------------------------------------------------------------------------------------------------------------------------------------------------------------------------------------------------------------------------------------------------------------------------------------------------------------------------------------------------------------------------------------------------------------------------------------------------------------------------------------------------------------------------|
| IBD              | Patients with documented CD, UC or IBD-U, >4 years old                                                                                                                                                                                                                                                                                                                                                                                                                                                                                                                                                                                                                         | <ul style="list-style-type: none"> <li>• subtotal colectomy and/or ileostomy patients</li> <li>• major comorbid condition where the projected survival is less than 5 years</li> <li>• difficulties with communication, including unable to communicate in English or French</li> <li>• diagnosis of schizophrenia</li> <li>• diagnosis of eating disorder</li> </ul>                                                                                                                                                                                                                                                                                            |
| IBS              | <p>Patients with IBS who have met Rome IV criteria, ≥13 years old</p> <p><b>IBS-D</b></p> <ul style="list-style-type: none"> <li>• Normal CBC</li> <li>• Negative tissue transglutaminase antibody if diarrhea the main symptom</li> <li>• Symptoms onset &gt; 45 years old, then negative colonic biopsies for microscopic colitis</li> </ul> <p><b>IBS-C, IBS-M &amp; IBS-U</b></p> <ul style="list-style-type: none"> <li>• Negative tissue transglutaminase antibody</li> <li>• Symptoms onset &gt; 50 years age, with new symptoms &lt; 1 year duration, then have a negative colonoscopy, CT colonography or Air Contrast Barium Enema.</li> <li>• Normal CBC</li> </ul> | <ul style="list-style-type: none"> <li>• major gastrointestinal surgery (Roux en y, bowel resection),</li> <li>• major comorbid condition, where the projected survival is less than 5 years</li> <li>• drug use that is the major cause of GI symptoms and/or undermines longitudinal compliance, including chronic antibiotic use, narcotic analgesics and substance abuse</li> <li>• narcotic analgesic use causing GI symptoms</li> <li>• difficulties with communication, including unable to communicate in English or French</li> <li>• diagnosis of schizophrenia</li> <li>• diagnosis of eating disorder</li> <li>• GI cancer within 5 years</li> </ul> |
| Healthy Controls | No gastrointestinal symptoms using the ROME IV Questionnaire                                                                                                                                                                                                                                                                                                                                                                                                                                                                                                                                                                                                                   | <ul style="list-style-type: none"> <li>• major gastrointestinal surgery (Roux en y, bowel resection)</li> <li>• any major comorbid chronic condition</li> <li>• difficulties with communication, including unable to communicate in English or French</li> <li>• diagnosis of schizophrenia</li> <li>• diagnosis of eating disorder</li> </ul>                                                                                                                                                                                                                                                                                                                   |

**Table 2: Participant Information Collection**

| Contact               | Screening period                             |                           | 12-month visit                                | 24-month visit                                | 36-month visit                                 | 48-month visit                                |
|-----------------------|----------------------------------------------|---------------------------|-----------------------------------------------|-----------------------------------------------|------------------------------------------------|-----------------------------------------------|
| Purpose               | Enrol in Study                               |                           | Health status<br>Biosamples<br>Questionnaires | Health status<br>Biosamples<br>Questionnaires | Health status<br>Biosamples,<br>Questionnaires | Health status<br>Biosamples<br>Questionnaires |
| Information collected | Contact by telephone, email or clinic visit. | Signed consent            | Medical history                               | Medical history                               | Medical history                                | Medical history                               |
|                       |                                              | Eligibility screening     | Obtain urine, stool, blood                    | Obtain urine, stool, blood                    | Obtain urine, stool, blood                     | Obtain urine, stool, blood                    |
|                       | Explain project                              | Demographics              | Questionnaires                                | Questionnaires                                | Questionnaires                                 | Questionnaires                                |
|                       |                                              | Medical history           |                                               |                                               |                                                |                                               |
|                       | Set up study visit(s)                        | Provide urine & stool kit |                                               |                                               |                                                |                                               |
|                       |                                              | Obtain blood (+DNA)       |                                               |                                               |                                                |                                               |
|                       |                                              | Questionnaires            |                                               |                                               |                                                |                                               |

**Table 3: List of Patient-answered Questionnaires**

| SUBGROUP   | ADULTS                                                                                                                                                                                                                                                                                                                                                                                                | PEDIATRICS                                                                                                                                                                                                                                                                                                                                 |
|------------|-------------------------------------------------------------------------------------------------------------------------------------------------------------------------------------------------------------------------------------------------------------------------------------------------------------------------------------------------------------------------------------------------------|--------------------------------------------------------------------------------------------------------------------------------------------------------------------------------------------------------------------------------------------------------------------------------------------------------------------------------------------|
| <b>IBS</b> | <ul style="list-style-type: none"> <li>Demographic Questionnaire</li> </ul>                                                                                                                                                                                                                                                                                                                           | <ul style="list-style-type: none"> <li>Demographics (exclusions apply)</li> </ul>                                                                                                                                                                                                                                                          |
|            | <i>Disease Specific</i>                                                                                                                                                                                                                                                                                                                                                                               |                                                                                                                                                                                                                                                                                                                                            |
|            | <ul style="list-style-type: none"> <li>IBS Severity Score</li> </ul>                                                                                                                                                                                                                                                                                                                                  | <ul style="list-style-type: none"> <li>IBS Severity Score</li> <li>Rome IV Diagnostic Questionnaire</li> </ul>                                                                                                                                                                                                                             |
|            | <i>GI Symptoms</i>                                                                                                                                                                                                                                                                                                                                                                                    |                                                                                                                                                                                                                                                                                                                                            |
|            | <ul style="list-style-type: none"> <li>PROMIS Scale 5a – (GI Belly Pain)</li> <li>PROMIS Scale 6a – (GI Diarrhea)</li> <li>PROMIS Scale 9a – (GI Constipation)</li> <li>PROMIS Scale 13a – (GI Gas &amp; Bloating)</li> <li>Leeds Dyspepsia Questionnaire</li> </ul>                                                                                                                                  | <ul style="list-style-type: none"> <li>PedsQL GI Symptoms Scale- (stomach pain and hurt; discomfort when eating; heartburn &amp; reflux; nausea &amp; vomiting; gas &amp; bloating; constipation; blood in BM; diarrhea; worry about stomach aches; worry about BM) - Age 5-17</li> </ul>                                                  |
|            | <i>General Quality of Life</i>                                                                                                                                                                                                                                                                                                                                                                        |                                                                                                                                                                                                                                                                                                                                            |
|            | <ul style="list-style-type: none"> <li>Euro Quality of Life</li> </ul>                                                                                                                                                                                                                                                                                                                                | <ul style="list-style-type: none"> <li>Euro Quality of Life Youth - Age 8-15</li> <li>Euro Quality of Life 5 Level - Age 16 +</li> </ul>                                                                                                                                                                                                   |
|            | <i>Psychological</i>                                                                                                                                                                                                                                                                                                                                                                                  |                                                                                                                                                                                                                                                                                                                                            |
|            | <ul style="list-style-type: none"> <li>Patient Health Questionnaire</li> <li>PROMIS-29 – (Physical Function, Anxiety, Depression, Fatigue, Sleep Disturbance, Pain Interference &amp; Intensity)</li> <li>Generalized Anxiety Disorder (GAD-7)</li> <li>Perceived Stress Scale</li> <li>Adverse Childhood Experiences</li> <li>Brief Resiliency Survey</li> <li>Pain Catastrophizing Scale</li> </ul> | <ul style="list-style-type: none"> <li>PROMIS-25 - (Physical Function Mobility; Anxiety; Depressive Symptoms; Fatigue; Peer Relations; Pain Interference) - Age 5-17</li> <li>Brief Resiliency Survey - Age 12-17</li> <li>Pain Catastrophizing Scale - Age 8-17</li> <li>Revised Child Anxiety and Depression Scale - Age 6-17</li> </ul> |
|            | <i>Productivity</i>                                                                                                                                                                                                                                                                                                                                                                                   |                                                                                                                                                                                                                                                                                                                                            |
|            | <ul style="list-style-type: none"> <li>Work Productivity &amp; Activity Index</li> </ul>                                                                                                                                                                                                                                                                                                              |                                                                                                                                                                                                                                                                                                                                            |
|            | <i>Diet</i>                                                                                                                                                                                                                                                                                                                                                                                           |                                                                                                                                                                                                                                                                                                                                            |
|            | <ul style="list-style-type: none"> <li>Food Frequency Questionnaire</li> <li>FODMAP Questionnaire</li> </ul>                                                                                                                                                                                                                                                                                          | <ul style="list-style-type: none"> <li>Food Frequency Questionnaire</li> <li>FODMAP Questionnaire</li> </ul>                                                                                                                                                                                                                               |
| <b>IBD</b> | <ul style="list-style-type: none"> <li>Demographic Questionnaire</li> </ul>                                                                                                                                                                                                                                                                                                                           | <ul style="list-style-type: none"> <li>Demographics (exclusions apply)</li> </ul>                                                                                                                                                                                                                                                          |
|            | <i>Disease Specific</i>                                                                                                                                                                                                                                                                                                                                                                               |                                                                                                                                                                                                                                                                                                                                            |

|                         |                                                                                                                                                                                                                                                                                                                                                                                                       |                                                                                                                                                                                                                                                                                                                                            |
|-------------------------|-------------------------------------------------------------------------------------------------------------------------------------------------------------------------------------------------------------------------------------------------------------------------------------------------------------------------------------------------------------------------------------------------------|--------------------------------------------------------------------------------------------------------------------------------------------------------------------------------------------------------------------------------------------------------------------------------------------------------------------------------------------|
|                         | <ul style="list-style-type: none"> <li>Short IBD Symptom Inventory</li> </ul>                                                                                                                                                                                                                                                                                                                         | <ul style="list-style-type: none"> <li>IMPACT – III - Ages 9-17</li> <li>PUCAI (UC); PCDAI (CD)</li> </ul>                                                                                                                                                                                                                                 |
|                         | <b>GI Symptoms</b>                                                                                                                                                                                                                                                                                                                                                                                    |                                                                                                                                                                                                                                                                                                                                            |
|                         | <ul style="list-style-type: none"> <li>PROMIS Scale 5a – (GI Belly Pain)</li> <li>PROMIS Scale 6a – (GI Diarrhea)</li> <li>PROMIS Scale 9a – (GI Constipation)</li> <li>PROMIS Scale 13a – (GI Gas &amp; Bloating)</li> <li>Leeds Dyspepsia Questionnaire</li> </ul>                                                                                                                                  | <ul style="list-style-type: none"> <li>PedsQL GI Symptoms Scale- (stomach pain and hurt; discomfort when eating; heartburn &amp; reflux; nausea &amp; vomiting; gas &amp; bloating; constipation; blood in BM; diarrhea; worry about stomach aches; worry about BM) - Age 4-17</li> </ul>                                                  |
|                         | <b>General Quality of Life</b>                                                                                                                                                                                                                                                                                                                                                                        |                                                                                                                                                                                                                                                                                                                                            |
|                         | <ul style="list-style-type: none"> <li>Euro Quality of Life</li> </ul>                                                                                                                                                                                                                                                                                                                                | <ul style="list-style-type: none"> <li>Euro Quality of Life Youth - Age 8-15</li> </ul>                                                                                                                                                                                                                                                    |
|                         | <b>Psychological</b>                                                                                                                                                                                                                                                                                                                                                                                  |                                                                                                                                                                                                                                                                                                                                            |
|                         | <ul style="list-style-type: none"> <li>Patient Health Questionnaire</li> <li>PROMIS-29 – (Physical Function, Anxiety, Depression, Fatigue, Sleep Disturbance, Pain Interference &amp; Intensity)</li> <li>Generalized Anxiety Disorder (GAD-7)</li> <li>Perceived Stress Scale</li> <li>Adverse Childhood Experiences</li> <li>Brief Resiliency Survey</li> <li>Pain Catastrophizing Scale</li> </ul> | <ul style="list-style-type: none"> <li>PROMIS-25 - (Physical Function Mobility; Anxiety; Depressive Symptoms; Fatigue; Peer Relations; Pain Interference) - Age 5-17</li> <li>Brief Resiliency Survey - Age 12-17</li> <li>Pain Catastrophizing Scale - Age 8-17</li> <li>Revised Child Anxiety and Depression Scale - Age 6-17</li> </ul> |
|                         | <b>Productivity</b>                                                                                                                                                                                                                                                                                                                                                                                   |                                                                                                                                                                                                                                                                                                                                            |
|                         | <ul style="list-style-type: none"> <li>Work Productivity &amp; Activity Index</li> </ul>                                                                                                                                                                                                                                                                                                              |                                                                                                                                                                                                                                                                                                                                            |
|                         | <b>Diet</b>                                                                                                                                                                                                                                                                                                                                                                                           |                                                                                                                                                                                                                                                                                                                                            |
|                         | <ul style="list-style-type: none"> <li>Food Frequency Questionnaire</li> <li>FODMAP Questionnaire</li> </ul>                                                                                                                                                                                                                                                                                          | <ul style="list-style-type: none"> <li>Food Frequency Questionnaire</li> <li>FODMAP Questionnaire</li> </ul>                                                                                                                                                                                                                               |
| <b>Healthy controls</b> | <ul style="list-style-type: none"> <li>Demographic Questionnaire</li> </ul>                                                                                                                                                                                                                                                                                                                           | <ul style="list-style-type: none"> <li>Demographics (exclusions apply)</li> </ul>                                                                                                                                                                                                                                                          |
|                         | <b>GI Symptoms</b>                                                                                                                                                                                                                                                                                                                                                                                    |                                                                                                                                                                                                                                                                                                                                            |
|                         | <ul style="list-style-type: none"> <li>PROMIS Scale 5a – (GI Belly Pain)</li> <li>PROMIS Scale 6a – (GI Diarrhea)</li> <li>PROMIS Scale 9a – (GI Constipation)</li> <li>PROMIS Scale 13a – (GI Gas &amp; Bloating)</li> <li>Leeds Dyspepsia Questionnaire</li> </ul>                                                                                                                                  | <ul style="list-style-type: none"> <li>PedsQL GI Symptoms Scale- (stomach pain and hurt; discomfort when eating; heartburn &amp; reflux; nausea &amp; vomiting; gas &amp; bloating; constipation; blood in BM; diarrhea; worry about stomach aches; worry about BM) Age 5-17</li> </ul>                                                    |
|                         | <b>General Quality of Life</b>                                                                                                                                                                                                                                                                                                                                                                        |                                                                                                                                                                                                                                                                                                                                            |
|                         | <ul style="list-style-type: none"> <li>Euro Quality of Life</li> </ul>                                                                                                                                                                                                                                                                                                                                | <ul style="list-style-type: none"> <li>Euro Quality of Life Youth - Age 8-15</li> <li>Euro Quality of Life 5 Level - Age 16 +</li> </ul>                                                                                                                                                                                                   |

|  |                                                                                                                                                                                                                                                                                                                                                                                                                     |                                                                                                                                                                                                                                                                                                                                                    |
|--|---------------------------------------------------------------------------------------------------------------------------------------------------------------------------------------------------------------------------------------------------------------------------------------------------------------------------------------------------------------------------------------------------------------------|----------------------------------------------------------------------------------------------------------------------------------------------------------------------------------------------------------------------------------------------------------------------------------------------------------------------------------------------------|
|  | <b><i>Psychological</i></b>                                                                                                                                                                                                                                                                                                                                                                                         |                                                                                                                                                                                                                                                                                                                                                    |
|  | <ul style="list-style-type: none"> <li>• Patient Health Questionnaire</li> <li>• PROMIS-29 – (Physical Function, Anxiety, Depression, Fatigue, Sleep Disturbance, Pain Interference &amp; Intensity)</li> <li>• Generalized Anxiety Disorder (GAD-7)</li> <li>• Perceived Stress Scale</li> <li>• Adverse Childhood Experiences</li> <li>• Brief Resiliency Survey</li> <li>• Pain Catastrophizing Scale</li> </ul> | <ul style="list-style-type: none"> <li>• PROMIS-25 - (Physical Function Mobility; Anxiety; Depressive Symptoms; Fatigue; Peer Relations; Pain Interference) - Age 5-17</li> <li>• Brief Resiliency Survey - Age 12-17</li> <li>• Pain Catastrophizing Scale - Age 8-17</li> <li>• Revised Child Anxiety and Depression Scale - Age 6-17</li> </ul> |
|  | <b><i>Productivity</i></b>                                                                                                                                                                                                                                                                                                                                                                                          |                                                                                                                                                                                                                                                                                                                                                    |
|  | <ul style="list-style-type: none"> <li>• Work Productivity &amp; Activity Index</li> </ul>                                                                                                                                                                                                                                                                                                                          |                                                                                                                                                                                                                                                                                                                                                    |
|  | <b><i>Diet</i></b>                                                                                                                                                                                                                                                                                                                                                                                                  |                                                                                                                                                                                                                                                                                                                                                    |
|  | <ul style="list-style-type: none"> <li>• Food Frequency Questionnaire</li> <li>• FODMAP Questionnaire</li> </ul>                                                                                                                                                                                                                                                                                                    | <ul style="list-style-type: none"> <li>• Food Frequency Questionnaire</li> <li>• FODMAP Questionnaire</li> </ul>                                                                                                                                                                                                                                   |



**APPENDIX 1: IMAGINE MEMBERS (alphabetically)****Hamilton:**

Premysl Bercik  
John Bienenstock  
Stephen Collins  
Russel de Souza  
Aida Fernandes (Executive Director)  
Benicio Frey  
Khurram Khan  
John Lavis  
Paul Moayyedi (PI)  
Nikil Pai  
Mary Sherlock  
Mike Surette  
Elena Verdu

**Calgary:**

Christopher Andrews  
Paul Beck  
Humberto Jijon  
Gilaad G. Kaplan  
Glenda MacQueen (post-humous)  
Deborah Marshall  
Yasmin Nasser  
Remo Panaccione  
Cynthia Seow  
Valerie Taylor

**Winnipeg:**

Charles Bernstein  
Wael El-Matary  
Patricia Furer  
Jean-Eric Ghia  
Lesley Graff  
Harminder Singh  
John Walker (post-humous)

**Edmonton:**

Leo Dieleman  
Richard Fedorak (post-humous)  
Hien Huynh  
Dina Kao  
Karen Madsen

1  
2  
3 Puneeta Tandon  
4 Eytan Wine  
5

6  
7 Kingston:  
8 David Reed  
9 Dean Tripp  
10 Stephen Vanner  
11

12  
13 Halifax:  
14 Jennifer Jones  
15 Anthony Otley  
16 Johan Van Limbergen  
17

18  
19 Montreal:  
20 Alain Bitton  
21 Justin Cote-Daigneault  
22 Christophe Faure  
23 Peter Lakatos  
24 John Rioux  
25 Sacha Sidani  
26  
27

28  
29 Toronto:  
30 Ken Croitoru  
31 Louis Liu  
32 Jeff Meyer  
33 Geoffrey Nguyen  
34 Laura Targownik  
35  
36

37 Ottawa:  
38 Eric Benchimol  
39 Sanjay Murthy  
40  
41

42 St John's:  
43 Mark Borgaonkar  
44  
45

46 Vancouver:  
47 Brian Bressler  
48

49 **Patient Research Partners:**

50 Gail Bellissimo  
51 Sara Blake  
52 Kim Daley  
53 Alysia DeNino  
54 Anny Fernandez  
55  
56  
57  
58  
59  
60

1  
2  
3 Shauna Jones  
4 Ellen Keunzig  
5 Sophie LeBlanc  
6 Nadine Mackay  
7 Lisa MacNeil  
8 Megan Marsiglio  
9 Kate Mason  
10 Adhiyat Najam  
11 Emma Neary  
12 Shawn Reynolds  
13 Perry Steckly  
14 Amy Van Engelen  
15 Karthika Yogaratnam  
16 Sandra Zelinsky  
17  
18  
19  
20  
21  
22  
23  
24  
25  
26  
27  
28  
29  
30  
31  
32  
33  
34  
35  
36  
37  
38  
39  
40  
41  
42  
43  
44  
45  
46  
47  
48  
49  
50  
51  
52  
53  
54  
55  
56  
57  
58  
59  
60
