# Supplementary material for: IMAGINE Network’s Mind And Gut Interactions Cohort (MAGIC) Study: a protocol for a prospective observational multicentre cohort study in inflammatory bowel disease and irritable bowel syndrome
Source: PubMed Central journal article supplement — BMJ Open. 2020 Oct 21;10(10):e041733. doi: 10.1136/bmjopen-2020-041733 (PMC7580069; doi:10.1136/bmjopen-2020-041733), 2020-10-21
Supplement: bmjopen-2020-041733supp001.pdf [file bmjopen-2020-041733supp001.pdf]

**APPENDIX 1: IMAGINE MEMBERS (alphabetically)****Hamilton:**

Premysl Bercik  
John Bienenstock  
Stephen Collins  
Russel de Souza  
Aida Fernandes (Executive Director)  
Benicio Frey  
Khurram Khan  
John Lavis  
Paul Moayyedi (PI)  
Nikil Pai  
Mary Sherlock  
Mike Surette  
Elena Verdu

**Calgary:**

Christopher Andrews  
Paul Beck  
Humberto Jijon  
Gilaad G. Kaplan  
Glenda MacQueen (post-humous)  
Deborah Marshall  
Yasmin Nasser  
Remo Panaccione  
Cynthia Seow  
Valerie Taylor

**Winnipeg:**

Charles Bernstein  
Wael El-Matary  
Patricia Furer  
Jean-Eric Ghia  
Lesley Graff  
Harminder Singh  
John Walker (post-humous)

**Edmonton:**

Leo Dieleman  
Richard Fedorak (post-humous)  
Hien Huynh  
Dina Kao  
Karen Madsen

Puneeta Tandon  
Eytan Wine

Kingston:  
David Reed  
Dean Tripp  
Stephen Vanner

Halifax:  
Jennifer Jones  
Anthony Otley  
Johan Van Limbergen

Montreal:  
Alain Bitton  
Justin Cote-Daigneault  
Christophe Faure  
Peter Lakatos  
John Rioux  
Sacha Sidani

Toronto:  
Ken Croitoru  
Louis Liu  
Jeff Meyer  
Geoffrey Nguyen  
Laura Targownik

Ottawa:  
Eric Benchimol  
Sanjay Murthy

St John's:  
Mark Borgaonkar

Vancouver:  
Brian Bressler

**Patient Research Partners:**

Gail Bellissimo  
Sara Blake  
Kim Daley  
Alysia DeNino  
Anny Fernandez

Shauna Jones  
Ellen Keunzig  
Sophie LeBlanc  
Nadine Mackay  
Lisa MacNeil  
Megan Marsiglio  
Kate Mason  
Adhiyat Najam  
Emma Neary  
Shawn Reynolds  
Perry Steckly  
Amy Van Engelen  
Karthika Yogaratnam  
Sandra Zelinsky
